# Supplementary material for: Serine 85 functions as a catalytic acid in the reprotonation process during EvAS-catalyzed astellifadiene biosynthesis
Source: Royal Society of Chemistry journal article supplement (doi:10.1039/d4cc03922j), 2024-01-01
Supplement: d4cc03922j1.pdf [file d4cc03922j1.pdf]

1 Supporting Information

2 Serine 85 functions as a catalytic acid in the  
3 reprotonation process during EvAS-catalyzed  
4 astellifadiene biosynthesis

5 *Weiyan Zhang,<sup>a</sup> Kaitong Peng,<sup>a</sup> Keying Lan,<sup>a</sup> Kangwei Xu,<sup>b</sup> Ruibo Wu,<sup>b</sup> Tom Hsiang,<sup>c</sup> Shaoping*  
6 *Nie,<sup>d</sup> Lixin Zhang,<sup>a</sup> Xinye Wang,<sup>\*a,e</sup> and Xueting Liu<sup>\*a</sup>*

7 **Correspondence**

8 Xueting Liu, State Key Laboratory of Bioreactor Engineering, and School of Biotechnology, East China University  
9 of Science and Technology (ECUST), Shanghai 200237, China.

10 E-mail: liuxueting@ecust.edu.cn (X. Liu); xywung@163.com (X. Wang).

11

12

13

14

15

16

17

18

19

20

21

22

## Table of Contents

|                                                                                                                                                                                         |    |
|-----------------------------------------------------------------------------------------------------------------------------------------------------------------------------------------|----|
| Supplemental Materials and Methods .....                                                                                                                                                | 5  |
| 1.1. General .....                                                                                                                                                                      | 5  |
| 1.2. Sequence alignment and structure-function relationships of BFTPSs .....                                                                                                            | 5  |
| 1.3. Structural analysis of EvAS-TC domain .....                                                                                                                                        | 5  |
| 1.4. Plasmids construction and site-directed mutagenesis.....                                                                                                                           | 5  |
| 1.5. Transformation of <i>S. cerevisiae</i> expressing wild-type EvAS and its variants.....                                                                                             | 6  |
| 1.6. Metabolites analysis by GC-MS.....                                                                                                                                                 | 6  |
| 1.7. Isolation and purification of compounds <b>1</b> and <b>2</b> .....                                                                                                                | 7  |
| 1.8. Computational details for DFT calculations.....                                                                                                                                    | 7  |
| 1.9. Molecular dynamic simulations.....                                                                                                                                                 | 7  |
| 1.10. Structural elucidation of compounds <b>1</b> and <b>2</b> . .....                                                                                                                 | 8  |
| 1.11. Protein sequence of EvAS (accession number: LC113889).....                                                                                                                        | 9  |
| 1.12. DNA sequence of codon-optimized <i>EvAS</i> (opt) .....                                                                                                                           | 10 |
| SUPPORTING FIGURES .....                                                                                                                                                                | 12 |
| Figure S1. Schematic diagram of the cyclization patterns correlated with representative sesterterpenes catalyzed by bifunctional terpene synthases (BFTPSs) from fungi. ....            | 12 |
| Figure S2. Proposed reaction mechanism for the generation of <b>1</b> .....                                                                                                             | 13 |
| Figure S3. HR-EI-MS spectrum of <b>1</b> .....                                                                                                                                          | 13 |
| Figure S4. <sup>1</sup> H NMR (600 MHz, C <sub>6</sub> D <sub>6</sub> ) spectrum of <b>1</b> . ....                                                                                     | 14 |
| Figure S5. <sup>13</sup> C NMR (150 MHz, C <sub>6</sub> D <sub>6</sub> ) spectrum of <b>1</b> . ....                                                                                    | 14 |
| Figure S6. HSQC NMR (600 MHz, C <sub>6</sub> D <sub>6</sub> ) spectrum of <b>1</b> .....                                                                                                | 15 |
| Figure S7. HR-EI-MS spectrum of <b>2</b> .....                                                                                                                                          | 15 |
| Figure S8. <sup>1</sup> H NMR (600 MHz, C <sub>6</sub> D <sub>6</sub> ) spectrum of <b>2</b> . ....                                                                                     | 16 |
| Figure S9. <sup>13</sup> C NMR (150 MHz, C <sub>6</sub> D <sub>6</sub> ) spectrum of <b>2</b> . ....                                                                                    | 16 |
| Figure S10. HSQC NMR (600 MHz, C <sub>6</sub> D <sub>6</sub> ) spectrum of <b>2</b> .....                                                                                               | 17 |
| Figure S11. <sup>1</sup> H- <sup>1</sup> H COSY NMR (600 MHz, C <sub>6</sub> D <sub>6</sub> ) spectrum of <b>2</b> . ....                                                               | 17 |
| Figure S12. HMBC NMR (600 MHz, C <sub>6</sub> D <sub>6</sub> ) spectrum of <b>2</b> .....                                                                                               | 18 |
| Figure S13. NOESY NMR (600 MHz, C <sub>6</sub> D <sub>6</sub> ) spectrum of <b>2</b> . ....                                                                                             | 18 |
| Figure S14. <sup>1</sup> H NMR (600 MHz, CDCl <sub>3</sub> ) spectrum of <b>2</b> .....                                                                                                 | 19 |
| Figure S15. <sup>13</sup> C NMR (150 MHz, CDCl <sub>3</sub> ) spectrum of <b>2</b> .....                                                                                                | 19 |
| Figure S16. The optimized lowest energy conformers for (2 <i>E</i> ,6 <i>E</i> ,10 <i>S</i> ,11 <i>R</i> ,14 <i>S</i> ,15 <i>S</i> ,18 <i>S</i> )- <b>2</b> at the B3LYP/6-31G(d). .... | 20 |

|                                                                                                                                                                                                                                              |    |
|----------------------------------------------------------------------------------------------------------------------------------------------------------------------------------------------------------------------------------------------|----|
| Figure S17. Experimental and calculated (B3LYP/6-31G(d,p)) ECD spectra of <b>2</b> .....                                                                                                                                                     | 20 |
| Figure S18. Protein models of TC domains of NfSS and EvAS predicted using AlphaFold2.<br>.....                                                                                                                                               | 21 |
| Figure S19. The PROCHECK results of EvAS-TC model indicate the good quality of the<br>model predicted using AlphaFold2.....                                                                                                                  | 21 |
| Figure S20. The structure of isolated compounds <b>1–2</b> and GC-MS profiles of crude extracts<br>obtained from EvAS-WT, and its variants. ....                                                                                             | 22 |
| Figure S21. Amino acid sequence alignments of Type B BFTPSs. ....                                                                                                                                                                            | 23 |
| Figure S22. Scatter diagrams of the conformations of the EvAS-WT/ <b>IM2</b> and EvAS-WT/ <b>2</b><br>complexes. ....                                                                                                                        | 23 |
| Figure S23. The Gibbs free energy profiles (in kcal/mol) for reprotonation sequence<br>mediated by carbonyl oxygen of serine, progressing from state <b>2</b> to <b>IM3</b> . ....                                                           | 24 |
| Figure S24. Conversion of <b>2_S-O_H</b> to <b>IM3_S-O</b> from IRC calculations. ....                                                                                                                                                       | 24 |
| Figure S25. Conversion of <b>2_S=O_H</b> to <b>IM3_S=O</b> from IRC calculations. ....                                                                                                                                                       | 25 |
| Figure S26. The RMSD profiles of the protein backbones of EvAS-WT/ <b>IM2</b> , and EvAS-<br>WT/ <b>2</b> , during 100 ns ( x 2) molecular dynamics simulations.....                                                                         | 25 |
| Figure S27. Mass spectra of (A) astellifadiene ( <b>1</b> ) and (B) astellifatriene ( <b>2</b> ) from the<br>transformants. ....                                                                                                             | 26 |
| SUPPORTING TABLES .....                                                                                                                                                                                                                      | 27 |
| Table S1. The bifunctional terpene synthases characterized from fungi and their products.<br>.....                                                                                                                                           | 27 |
| Table S2. Comparison of <sup>1</sup> H (600 MHz) and <sup>13</sup> C (150 MHz) NMR (in benzene- <i>d</i> <sub>6</sub> ) data of<br><b>1</b> to those of astellifadiene (500 MHz, in benzene- <i>d</i> <sub>6</sub> ) in the literature. .... | 30 |
| Table S3. 1D and 2D NMR Data of <b>2</b> . ....                                                                                                                                                                                              | 31 |
| Table S4. Comparison of <sup>1</sup> H (600 MHz) and <sup>13</sup> C (150 MHz) NMR (in CDCl <sub>3</sub> ) data of<br>astellifatriene ( <b>2</b> ) to those of <b>C1</b> (900 MHz, in CDCl <sub>3</sub> ) in the literature. ....            | 32 |
| Table S5. Measured specific rotation of compound <b>2</b> computed (Boltzmann-averaged and<br>relative free energies computed at b3lyp/6-311g(d,p) level) specific rotation at different<br>wavelengths. ....                                | 33 |
| Table S6. Relative production of the products from EvAS, and its variants.....                                                                                                                                                               | 34 |
| Table S7. Pocket volumes of EvAS and its variants predicted by POVME.....                                                                                                                                                                    | 34 |
| Table S8. Primers for mutation in this study. ....                                                                                                                                                                                           | 35 |
| Table S9. Energy analysis for the conformers of (2 <i>E</i> ,6 <i>E</i> ,10 <i>S</i> ,11 <i>R</i> ,14 <i>S</i> ,15 <i>S</i> ,18 <i>S</i> )- <b>2</b> . ....                                                                                  | 35 |
| Table S10. Cartesian coordinates for the conformers of (2 <i>E</i> ,6 <i>E</i> ,10 <i>S</i> ,11 <i>R</i> ,14 <i>S</i> ,15 <i>S</i> ,18 <i>S</i> )- <b>2</b> . .                                                                              | 36 |
| Table S11. The Gibbs free energy profiles for reprotonation sequences mediated by<br>hydroxyl oxygen and carbonyl oxygen of serine, progressing from state <b>2</b> to <b>IM3</b> . ....                                                     | 37 |

|                                                                                                                                                                                                                          |    |
|--------------------------------------------------------------------------------------------------------------------------------------------------------------------------------------------------------------------------|----|
| Table S12. Cartesian coordinates of the intermediates and transition states for reprotonation sequences mediated by hydroxyl oxygen and carbonyl oxygen of serine, progressing from state <b>2</b> to <b>IM3</b> . ..... | 37 |
| References.....                                                                                                                                                                                                          | 40 |

## Supplemental Materials and Methods

### 1.1. General

Oligonucleotide synthesis and DNA sequencing were performed by Tsingke (Beijing, China). The plasmid preparation kit I (D6943-02) was obtained from Omega Bio-tek (Norcross, GA, USA), and the ClonExpress II One Step Cloning Kit was purchased from Vazyme Biotech Co., Ltd. (Nanjing, China). All commercial chemicals were acquired from Sigma (Saint Louis, MO, USA), Takara (Otsu, Japan), Adamas-beta (Shanghai, China), or Sinopharm Chemical Reagent (Shanghai, China). Semipreparative HPLC was conducted using a ZORBAX SB-C18 column (10 × 250 mm, 5 μm). The <sup>1</sup>H, <sup>13</sup>C, and 2D NMR were recorded on an Agilent DD2 (Santa Clara, CA, USA) 600 MHz NMR spectrometer. The NMR spectra were referenced to solvent signals with resonances at δ<sub>H</sub> 7.16 ppm, δ<sub>C</sub> 128.06 ppm in C<sub>6</sub>D<sub>6</sub>, and δ<sub>H</sub> 7.26 ppm, δ<sub>C</sub> 77.1 ppm in CDCl<sub>3</sub>. Circular dichroism (CD) spectra were recorded on a Chirascan circular dichroism spectrometer using methanol as the solvent. High-resolution electron ionization mass spectrometry (HR-EI-MS) measurements were obtained using a Waters GCT Premier mass spectrometer. All fermentation biomass was collected using an Avanti JXN-26 centrifuge (Beckman Coulter, USA). Gas chromatography-mass spectrometry (GC-MS) analyses were performed on a Shimadzu GC-2010 Plus connected to a Shimadzu GCMS-QP2010 SE gas chromatograph-mass spectrometer with a DB-5 ms column (30 m × 0.25 μm × 0.25 mm, Shimadzu, Japan).

### 1.2. Sequence alignment and structure-function relationships of BFTPSs

Protein BLAST analyses were conducted using the Swiss-Prot database at <http://www.ncbi.nlm.nih.gov/BLAST>. ClustalW was employed to generate a multiple sequence alignment, which was then analyzed and visualized using ESPript 3.0 (<https://espript.ibcp.fr/ESPrript/cgi-bin/ESPrript.cgi>). The candidate gene *EvAS* was identified in the genome of *Emericella varicolor* NBRC 32302 (GenBank accession number: LC113889), as retrieved from the NCBI protein database (Table S1).<sup>1</sup> The *EvAS* gene was codon-optimized and synthesized by Tsingke (Beijing, China).

### 1.3. Structural analysis of EvAS-TC domain

Predictive modeling of the terpene cyclase (TC) domain of *EvAS* was performed using AlphaFold2.<sup>2</sup> Based on the crystal structures of the fungal sesterterpene synthases NfSS (PDB ID: 8yla) and PbSS (PDB ID: 8yl9),<sup>3</sup> three Mg<sup>2+</sup> ions and PPi groups from these structures were incorporated into the *EvAS*-TC model. The active site of *EvAS*-TC was analyzed using POVME,<sup>4</sup> and amino acids within 5 Å of the active site were selected. Excluding amino acids involved in Mg<sup>2+</sup> coordination from conserved motifs, eight key residues were identified: I66, S85, F89, F187, W188, S303, N307, and W310.

### 1.4. Plasmids construction and site-directed mutagenesis

The gene encoding *EvAS* was subjected to codon optimization and synthesis before being cloned into shuttle vectors (pXW55) designed for *Saccharomyces cerevisiae* (*S. cerevisiae*). The gene was then expressed in *S. cerevisiae* strain BJ5464.<sup>5</sup> Putative active sites in the catalytic pocket were targeted for mutagenesis using the pXW55-*wt* plasmid. Table S8 lists the primers used for constructing the mutation libraries of *EvAS*. Mutations were

introduced into the *EvAS* gene within the pXW55 vector via site-directed mutagenesis using PCR. The PCR reaction system is as follows:

|                              |             |
|------------------------------|-------------|
| pYET-XW55- <i>EvAS-wt</i>    | < 50 ng     |
| Primer F                     | 0.2 $\mu$ M |
| Primer R                     | 0.2 $\mu$ M |
| PrimeSTAR MAX DNA Polymerase | 5 $\mu$ L   |
| ddH <sub>2</sub> O           | 4.6 $\mu$ L |
| Total                        | 10 $\mu$ L  |

PCR amplification was conducted using PrimeSTAR® MAX DNA Polymerase (Takara) in a three-step reaction, using the following program: 98 °C, 30 s; (98 °C, 10 s; 60 °C, 15 s; 72 °C, 55 s)  $\times$  30 cycles; 72 °C, 5 min. After amplification, the DNA was combined with 2  $\mu$ L of 6x DNA Loading Buffer and analyzed by electrophoresis on a 1% agarose gel containing DuRed nucleic acid dye. The gel was run at 125 V for 40 minutes. After electrophoresis, the gel was imaged to verify the presence of the target bands. To enhance amplification, the PCR reaction volume was increased to 50  $\mu$ L while maintaining the same conditions as the 10  $\mu$ L reaction. Subsequently, the PCR products were digested with a plasmid template, purified, and subjected to homologous recombination. Plasmid sequencing confirmed the successful incorporation of the desired mutations. Subsequently, the plasmid containing the mutated *EvAS* genes were transformed into *E. coli* DH10b.

### 1.5. Transformation of *S. cerevisiae* expressing wild-type *EvAS* and its variants

The reconstructed plasmids pXW55-*EvAS* and its variants were introduced into *S. cerevisiae* strain BJ5464.<sup>5</sup> The procedure for *S. cerevisiae* strain BJ5464 homologous recombination using the Yeast Transformation II Kit (ZYMO RESEARCH) is as follows: i) Thaw the competent cells at room temperature; ii) Add 0.2–1  $\mu$ g (up to 5  $\mu$ g) of the reconstructed plasmids to 50  $\mu$ L of competent cells, then add 500  $\mu$ L of EZ 3 solution and mix thoroughly by vortexing; iii) Incubate at 30°C for 45 minutes, gently vortexing every 2–3 minutes during incubation; iv) Spread the transformation mixture evenly on the agar plates and incubate at 30°C for 2–4 days. After plating, colonies were picked for protein overexpression, and then cultured in 5 mL of uracil-dropout medium (20 g/L glucose, 5.0 g/L casamino acids, 0.02 g/L adenine, 6.7 g/L YNB, 0.02 g/L tryptophan, pH 7.5) at 30°C with shaking at 220 rpm for 48 hours. Subsequently, 1 mL of the culture was transferred to a 250 mL flask containing 50 mL of YPD medium (20 g/L tryptone, 10 g/L yeast extract, 20 g/L glucose, pH 7.5), and fermentation proceeded at 30°C with shaking at 220 rpm for 3 days.

### 1.6. Metabolites analysis by GC-MS

After centrifugation to collect the cell pellets from the small-scale culture, the cells were disrupted with acetone and sonicated for 45 minutes. The resulting cell extract was then concentrated under vacuum. The residues were reconstituted in a mixture of water and ethyl acetate. The ethyl acetate-soluble fraction was evaporated under vacuum to yield crude extracts. These extracts, dissolved in ethyl acetate at a concentration of 1 mg/mL, were analyzed using GC-MS. The GC-MS analysis was performed using a DB-5ms column (30 m  $\times$  0.25 mm i.d., 0.25  $\mu$ m film thickness, Shimadzu) under the following conditions. The inlet pressure was set to 110 kPa, and the injection volume was 1  $\mu$ L. The sample was injected at 60 °C in split mode. The column temperature was initially increased at a rate of 25 °C/min to 280 °C, then further increased at 10 °C/min to 310 °C, where it was held isothermally for 6

minutes. The flow rate of helium carrier gas was maintained at 1.77 mL/min. The mass spectrometry (MS) settings were as follows: source temperature of 200 °C, transfer line temperature of 250 °C, and electron energy of 0.4 kV.

### 1.7. Isolation and purification of compounds 1 and 2

After a 10 L fermentation of *S. cerevisiae* expressing EvAS-WT, the biomass was collected by centrifugation at 4500 rpm for 10 minutes, yielding 240 g. The biomass was then subjected to three 45-minute ultrasonication treatments with acetone at room temperature, followed by extraction with ethyl acetate. The ethyl acetate extract was concentrated under vacuum, producing a crude extract weighing 0.8 g. This crude extract was fractionated using a silica gel column, resulting in fractions A–D. Fraction A was further purified using semipreparative HPLC with 100% acetonitrile on a ZORBAX SB-C18 column, leading to the isolation of compounds **1** (7.0 mg) and **2** (3.0 mg).

Approximately 25 g (wet weight) of biomass was obtained from the 1 L fermentation of *S. cerevisiae* expressing EvAS-S85N. The biomass was subjected to three 45-minute ultrasonication treatments with acetone at room temperature, followed by extraction with ethyl acetate. The resulting ethyl acetate extract was concentrated under vacuum, yielding 90 mg of crude extract. This crude extract was then fractionated using a silica gel column with hexane as the eluent, producing three fractions (Fr. 1–3). Fraction 1 was further purified by semipreparative HPLC on a ZORBAX SB-C18 column with isocratic elution of 100% acetonitrile, resulting in the isolation of compound **2** (0.9 mg).

### 1.8. Computational details for DFT calculations

The conformational analysis of compound **2** was performed using the MMFF94 molecular force field and a random search approach in SYBYL X 2.1 software. All conformers within a 10 kcal/mol energy range were identified and further optimized using the B3LYP/6-31G(d) level in the gas phase with Gaussian 09.<sup>6</sup> Conformers with a population exceeding 0.1% were then subjected to electronic circular dichroism (ECD) and specific optical rotation calculations. The ECD spectra were computed using the B3LYP/6-31G(d,p) method in a methanol environment. The simulated ECD curves were weighted according to the Boltzmann distribution of individual conformers. The specific optical rotations were calculated at the B3LYP/6-311G(d,p) level in chloroform using the PCM model at different wavelengths. The calculated specific optical rotation values were then averaged according to the Boltzmann distribution theory and relative Gibbs free energy.<sup>7</sup>

The molecular geometries of compound **2**, with a truncated serine, were optimized using density functional theory (DFT) at the B3LYP/6-31G(d) level. Frequency calculations at the same level of theory were performed to classify all stationary points as minima or transition states. Intrinsic reaction coordinate (IRC) analysis confirmed that all stationary points were smoothly connected. Single-point energies were computed using the mPW1PW91/6-311+G(d,p) method. Gibbs free energies for discussion were derived by adding gas-phase Gibbs free energy corrections obtained at the B3LYP/6-31G(d) level. All calculations were conducted using Gaussian 09.<sup>6</sup>

### 1.9. Molecular dynamic simulations

Starting structures and system setup

The protein structures of the TC domains of NfSS and EvAS were predicted using AlphaFold2 (Fig. S18).<sup>2</sup> The predicted structure of NfSS was highly consistent with its crystal structure (PDB ID: 8yla), with a root-mean-square deviation (RMSD) of 0.581 Å for structure superposition and a TM-score of 0.956.<sup>8</sup> PROCHECK results indicated that the EvAS model, predicted using AlphaFold2, had a high score (Fig. S19). Consequently, this model was deemed suitable for further studies of EvAS. The TC domain of the EvAS model was reconstructed with the PPi group and a coordination shell of three Mg<sup>2+</sup> ions, based on the crystal structure of NfSS (sequence similarity: 35.6%; identity: 19.4%). The models of EvAS, EvAS-S85A, EvAS-S85N, EvAS-S85D, and EvAS-S85Y were reconstructed in the same manner. According to the proposed reaction mechanism for astellifadiene (**1**) in EvAS (Fig. S2),<sup>1</sup> intermediates **IM2** and **2** were docked into EvAS using AutoDock Vina.<sup>9</sup> A semi-flexible docking approach was employed to thoroughly sample conformations, accommodate flexibility, and investigate ligand-binding modes. Side chains of residues I66, S85, F89, F187, W188, S303, N307, and W310 were treated as flexible. The search grid box (25 × 25 × 25 Å<sup>3</sup>) was centered on the substrate-binding site, with an exhaustiveness setting of 64 and default options for other parameters. Finally, nine potential poses were identified from the docking results. The most rational and low-energy conformation was selected as the initial configuration for molecular dynamics simulations (MD). The protein and ions were parameterized using the Amber ff14SB<sup>10</sup> force field, and water molecules were assigned the TIP3P<sup>11</sup> model. Ligand force field parameters were generated with the GAFF force field,<sup>12</sup> with partial atomic charges derived from restrained electrostatic potential (RESP)<sup>13</sup> calculations based on HF/6-31G(d) in Gaussian 09.<sup>6</sup> The complexes were solvated in a truncated octahedral water box, extending 10.0 Å in each dimension, with Na<sup>+</sup> ions added to neutralize the system. Initial coordinates and topology files were generated using the tleap program in AMBER20.

#### MD simulations

MD simulations of apoproteins and receptor-ligand complexes were conducted with the AMBER20 package.<sup>14</sup> Initially, all atoms of the protein, ligand, and Mg<sup>2+</sup> were fixed, with only the water molecules free; subsequently, the protein backbone, ligand, and Mg<sup>2+</sup> were restrained. The system underwent routine minimization, leading to the formation of a protein-ligand complex with preliminary solvent relaxation. The complex was then gradually heated from 0 to 300 K under the NVT ensemble for 50 ps, followed by 100 ps of density equilibration under constant pressure without restraints. Finally, MD simulations were performed for 2 × 100 ns at 300 K, using the SHAKE algorithm to constrain covalent bonds involving hydrogen and the Particle Mesh Ewald (PME) method for long-range electrostatic interactions, with computations accelerated by GPU in the Amber 20 PAMED package.<sup>14</sup>

### 1.10. Structural elucidation of compounds **1** and **2**.

GC-MS analysis of compound **1** identified characteristic ion fragments at *m/z* 109, 161, 203, and 325 (Fig. S27A), along with a molecular ion peak at *m/z* 340, confirming its classification as a sesterterpene. The <sup>1</sup>H, <sup>13</sup>C, and HSQC NMR spectra (Figs. S4–S6, Table S2) displayed distinct resonances for five methyl groups, closely resembling those in astellifadiene synthesized by EvAS,<sup>1</sup> thereby confirming that compound **1** is astellifadiene.

GC-MS analysis of the extract from the transformant containing the *EvAS* gene identified a new metabolite, compound **2**, with an *m/z* of 340 (Fig. S27B). Based on the mass spectrum, we hypothesized that compound **2** is a novel sesterterpene hydrocarbon.



Compound **2** was isolated as colorless oil,  $[\alpha]_D^{30} + 152.0$  (c 1.25, CHCl<sub>3</sub>). The molecular formula of compound **2** was determined to be C<sub>25</sub>H<sub>40</sub> from its HR-EI-MS data ( $m/z$  340.3124 [M]<sup>+</sup>; calculated for C<sub>25</sub>H<sub>40</sub><sup>+</sup>, 340.3130). The <sup>1</sup>H and <sup>13</sup>C NMR spectra of **2** in C<sub>6</sub>D<sub>6</sub> (Figs. S8–S9, Table S3) showed signals consistent with two olefinic methines, an exomethylene, and five methyl groups, which are typical of a sesterterpene core scaffold. The presence of six degrees of unsaturation and six olefinic carbons in compound **2** suggests a tricyclic ring system.

The COSY spectrum of **2** revealed four spin systems of H-1/H-2, H-4/H-5/H-6, H-8/H-9/H-10/H-14/H-18/H-17/H-16, and H-12/H-13 (Fig. S11). In the HMBC spectrum, key correlations from the methyl signals were observed, as follows: H<sub>3</sub>-20 ( $\delta$  1.47) to C-2, C-3, and C-4; H<sub>3</sub>-21 ( $\delta$  1.45) to C-6, C-7, and C-8; H<sub>3</sub>-22 ( $\delta$  0.85) to C-10, C-11, C-1, and C-12; H<sub>3</sub>-23 ( $\delta$  0.87) to C-13, C-14, C-15, and C-16; H<sub>3</sub>-25 ( $\delta$  1.70) to C-18, C-19, and C-24 (Fig. S12). These cross signals confirmed the connections of C-3 to C-2, C-4, and C-20; C-7 to C-6, C-8, and C-21; C-11 to C-1, C-10, C-12, and C-22; C-15 to C-13, C-14, C-16 and C-23; and C-19 to C-18, C-24, and C-25. Furthermore, the HMBC correlations of H-24a ( $\delta$  4.77) and H-24b ( $\delta$  4.70) to C-18 and C-19 established the connections of C-18 to C-19, which defined the planar structure of **2** as a type B sesterterpene with a 5/6/11 tricyclic system (Fig. 2B). Comparative analysis of the <sup>1</sup>H and <sup>13</sup>C NMR spectroscopic data in CDCl<sub>3</sub> of **2** with those of **C1** produced by AtTPS06 from *Arabidopsis thaliana*<sup>15</sup> suggested structural similarities between them (Table S4). The relative stereochemistry of **2** was determined mainly by NOESY correlations (Fig. S13). The configurations of  $\Delta^{2,3}$  and  $\Delta^{6,7}$  double bonds were established as 2*E*,6*E* by the correlations of H-2 and H-4, as well as H-6 and H-8. The relative configurations of 10*S*\*,11*R*\*,14*S*\*,15*S*\*,18*S*\* were determined from the correlations between H-10 and H-23/H-18, H-18 and H-23, and H-14 and H-22/H-25. The absolute configuration of compound **2** was confirmed using time-dependent density functional theory (TD-DFT) to estimate its theoretical ECD curve at the B3LYP/6-31G(d,p) level. The simulated ECD spectrum matched the experimental spectrum, verifying the stereochemical assignments of 2*E*,6*E*,10*S*,11*R*,14*S*,15*S*,18*S* for compound **2** (Fig. S17). Thus, the absolute configuration of compound **2** was confirmed as 2*E*,6*E*,10*S*,11*R*,14*S*,15*S*,18*S*-**2**, an enantiomer of **C1**. Unfortunately, the specific optical rotation of the *A. thaliana* compound **C1** was not reported in the literature, as only 0.6 mg of the compound was isolated, which precluded its measurement. Therefore, a direct comparison of optical rotations could not be made. To further support our assignment, we calculated the optical rotation of compound **2** at different wavelengths using the B3LYP/6-311G(d,p) level in chloroform with the PCM model. The overall calculated optical rotation is positive (Table S5), closely matching the experimental value. These results confirm the absolute configuration of compound **2**, identifying it as the previously uncharacterized sesterterpene astellifatriene.

### 1.11. Protein sequence of EvAS (accession number: LC113889)

MEFKYSTLIDPEMYETEGLCDGIPVRYHNNPELEEIDCLRCHEHWRENVGPLGVYKGLADQWNGISIAIPEALPDRLGVVSYASEFAFVHDDVIDIAQHGNEQNDDLRLVGFQ MIDAGAIKYSTSGKRALQSYIAKRMLSIDRERAIISLRAWLEFIEKTGRQEERRFNNEK EFLKYRIYDVGMLFWYGLLTFAQKITIPENELTTCHELAIPAYRHMALLNDLVSWEK ERASSIALGKDYCINFIVAMEESGISEDEAKERCREEIKLATVDYLRVDFDEAKDRIDL SHDTMLYLESLLYSMSGNVVWGLQSPRYYTDAKFSQRQLDWIKNGLPLEVRLEDRV

FGLSPSEDRVTHQAVIENGLPESGLGKNGNSSNGVDV NKALLSAVLHEHLKGHAVF  
KMSDHEVKVKASNGRSLDTKVLQAPYEYITGLPSKRLREQAIDAMNVWFRVPAEKL  
DLIKSITLHNASLMLDDVEDGSELRRGNPSTHTIFGLSQTINSANYQLVRALERVQK  
LEDSESLLVFTEELRNL YIGQSM DLYWTGNLICPTMNEYFHMVECKTGGLFRLFTRL  
MSLHSTS AVKVDPTTLSTR LGIYFQTRDDYKNLVSTEYTKQKGYCEDLEEGKFSLPLI  
HLIQAMPDNHVLRNILTQWRVTRKVT LAQKQVVLGLMEKSGSLKFTRETLASLYSG  
LEKSFTELEEKFGTENFQLKLILQFLRTE

### 1.12. DNA sequence of codon-optimized *EvAS* (opt)

ATGGAATTCAAGTACTCCACTCTGATCGACCCGAAATGTACGAAACCGAAGGT  
CTGTGTGACGGTATCCCAGTTCGCTACCACAACAATCCGGAACCTGGAAGAAATC  
GACTGCCTGCGTTGCCACGAACACTGGCGTGAGAACGTTGGTCCGCTGGGTGTTT  
ACAAAGGTGGTCTGGCAGACCAGTGGAACGGTATCTCTATCGCGATTCCAGAAG  
CTTTGCCGGACCGTCTGGGTGTTGTTAGCTACGCTTCCGAATTCGCGTTCGTTTCAT  
GACGACGTTATCGACATCGCACAGCATGGTAACGAACAGAACGACGATCTGCGT  
GTTGGTTTCGAACAGATGATCGATGCGGGTGCAATCAAATACTCTACCTCCGGTA  
AACGTGCTCTGCAGTCTTACATCGCTAAACGTATGCTGTCTATCGACCGTGAACG  
TGCGATCATCTCTCTGCGTGCTTGGCTGGAATTCATCGAAAAGACCGGTGCTCAA  
GAAGAACGTCGTTTCAACAACGAGAAAGAATTCTTGAAATACCGTATCTACGAT  
GTTGGTATGCTGTTCTGGTACGGTCTTCTGACTTTCGCTCAGAAAATCACCATTCC  
GGAGAACGAACTGACTACCTGCCACGAACCTGGCGATTCCGGCATATCGTCACAT  
GGCGTTGCTGAACGACCTGGTTTCTTGGGAGAAAGAACGTGCATCTAGCATCGC  
GCTGGGTAAAGACTACTGCATCAACTTCATCTTCGTTGCTATGGAAGAATCTGGT  
ATCAGCGAAGACGAAGCGAAAGAACGTTGCCGTGAAGAAATCAAACCTGGCGAC  
CGTTGACTACCTGCGTGTGTTTCGACGAAGCGAAAGACCGTATCGACCTGTCTCAC  
GACACTATGCTGTACCTGGAAAGCCTGCTGTACTCCATGTCTGGTAACGTTGTTT  
GGGGTCTGCAGTCTCCACGTTACTACACTGACGCGAAATTCAGCCAGCGTCAGCT  
GGACTGGATCAAGAACGGTTTGCCGCTGGAAGTGCGTCTGGAAGATCGTGTGTT  
CGGTCTGAGTCCGTCTGAAGACCGTGTTACTCACCAGGCAGTAATCGAGAATGG  
CCTGCCAGAATCTGGTCTGGGTAAGAACGGTAACTCTTCCAACGGTGTTGACGTT  
AACAAAGCGCTGCTGTCTGCTGTACTGCACGAACACCTGAAAGGTCACGCGGTA  
TTCAAGATGTCTGATCACGAAGTGAAGGTTAAAGCTTCTAACGGTCGTAGCCTGG  
ACACTAAAGTTCTGCAGGCGCCATACGAATACATCACCAGGCTGCCGTCTAAACG  
TCTGCGTGAACAGGCGATCGATGCTATGAACGTTTGGTTCCGTGTTCCAGCGGAG  
AAACTGGACCTGATCAAATCCATCACCACCATCTTGCACAACGCGTCTCTGATGC  
TGGACGACGTTGAAGACGGTTCTGAACTGCGTCGTGGTAATCCATCTACTCACAC  
CATCTTCGGTCTTAGCCAGACCATCAACTCTGCGAACTACCAGCTGGTTCGTGCA  
CTGGAACGCGTTCAGAACTGGAAGACTCTGAAAGCTTGCTGGTGTTCCTGAA  
GAACTGCGTAACCTGTACATCGGTCAGTCTATGGACCTGTACTGGACTGGTAACC  
TGATCTGCCCGACCATGAACGAATACTTCCACATGGTTGAATGCAAGACCGGTG  
GTCTGTTCCGTCTCTTTACCCGTCTGATGTCTCTGCACTCCACCTCTGCAGTAAA  
GTTGATCCGACCACTCTGTCCACTCGTCTGGGTATCTACTTCCAGACTCGTGACG  
ACTACAAGAACCTGGTATCTACTGAGTACACCAAACAGAAAGGCTACTGTGAAG  
ATCTGGAAGAAGGCAAATTCTCTCTGCCGCTGATCCACCTGATCCAGGCAATGCC  
AGATAACCACGTTCTGCGTAACATTCTGACTCAGTGGCGTGTTACTCGTAAAGTA  
ACTCTGGCGCAGAAACAGGTTGTA CTGACTCGGTCTGATGGAGAAGTCCGGTAGCCTG

AAATTCACTCGTGAAACTCTGGCTAGCCTGTACTCTGGCCTGGAAAAAAGCTTCA  
CCGAACTGGAAGAGAAATTCGGCACTGAGAACTTCCAGCTGAAACTGATTCTGC  
AGTTCTTGCGTACTGAA

## SUPPORTING FIGURES

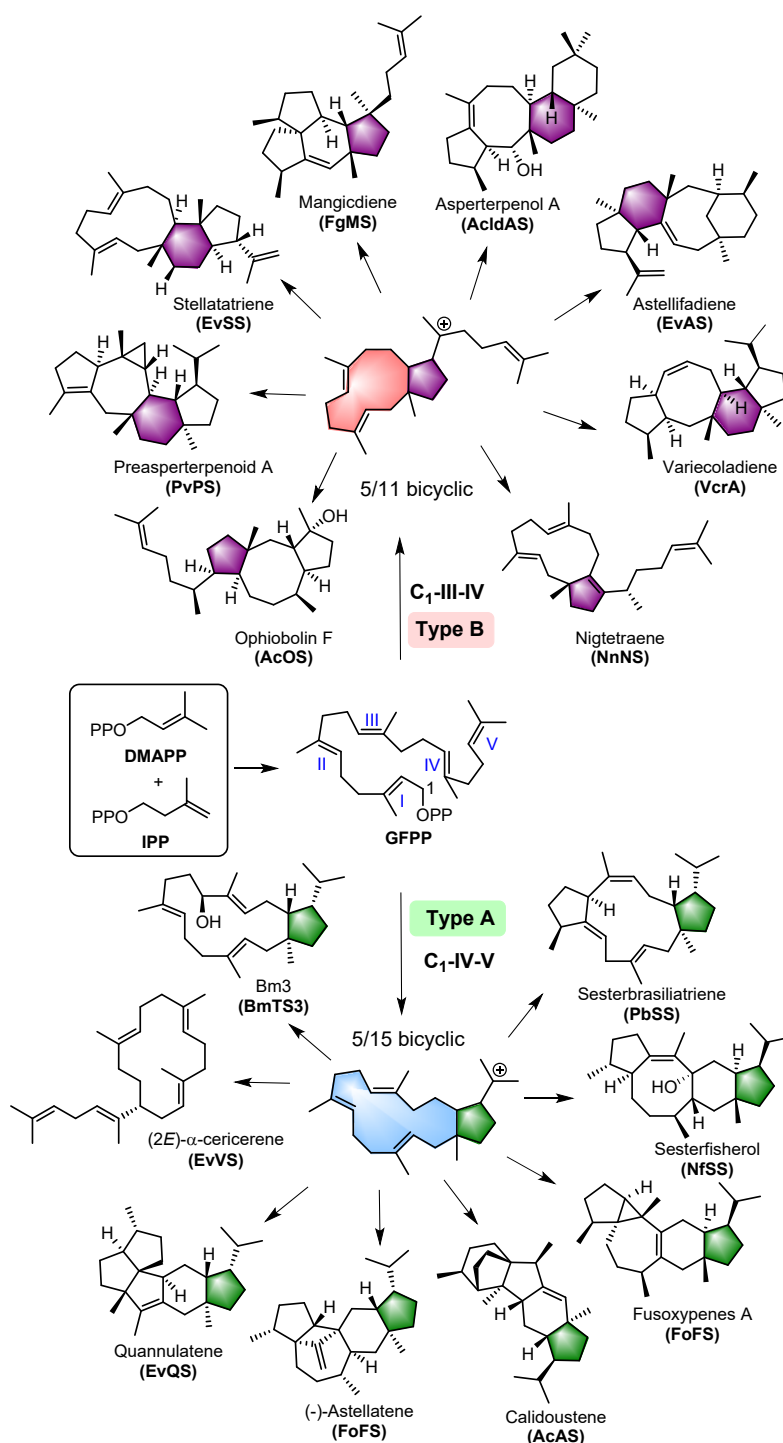

**Figure S1.** Schematic diagram of the cyclization patterns correlated with representative sesterterpenes catalyzed by bifunctional terpene synthases (BFTPSs) from fungi. Their cyclization patterns were correlated with the initial cyclization mode of a polyprenyl diphosphate, defined as Type A and Type B. Following pyrophosphate dissociation, the carbocation at C1 selectively engages with the IV and V double bonds in Type A, while targeting the III and IV double bonds in Type B.<sup>16</sup>

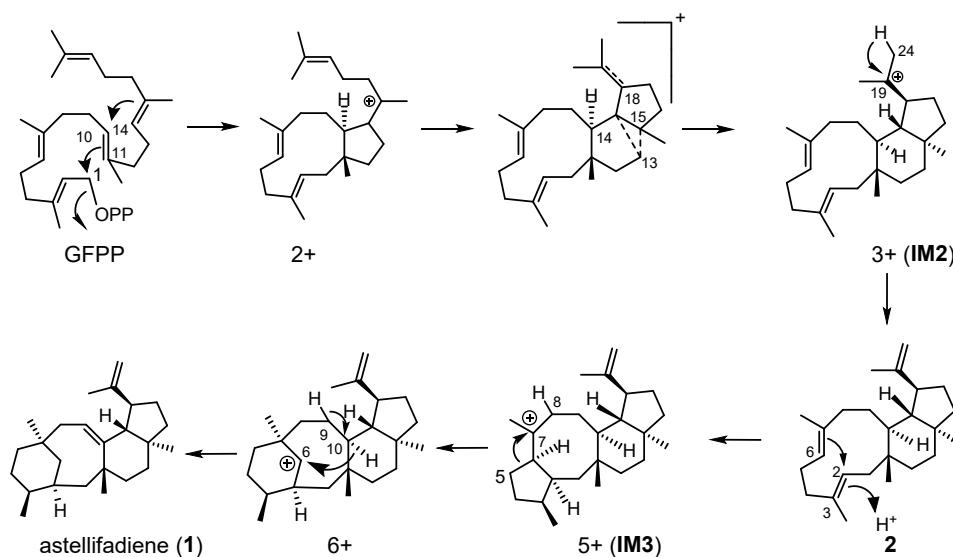

**Figure S2.** Proposed reaction mechanism for the generation of **1**.<sup>1</sup>

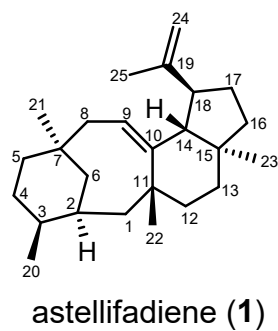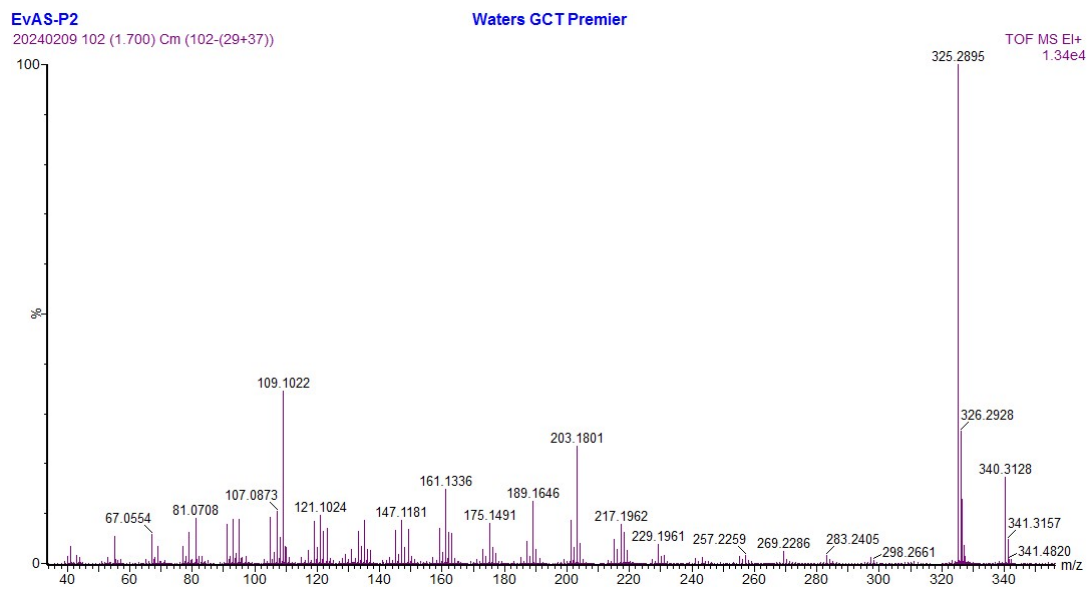

**Figure S3.** HR-EI-MS spectrum of **1**.

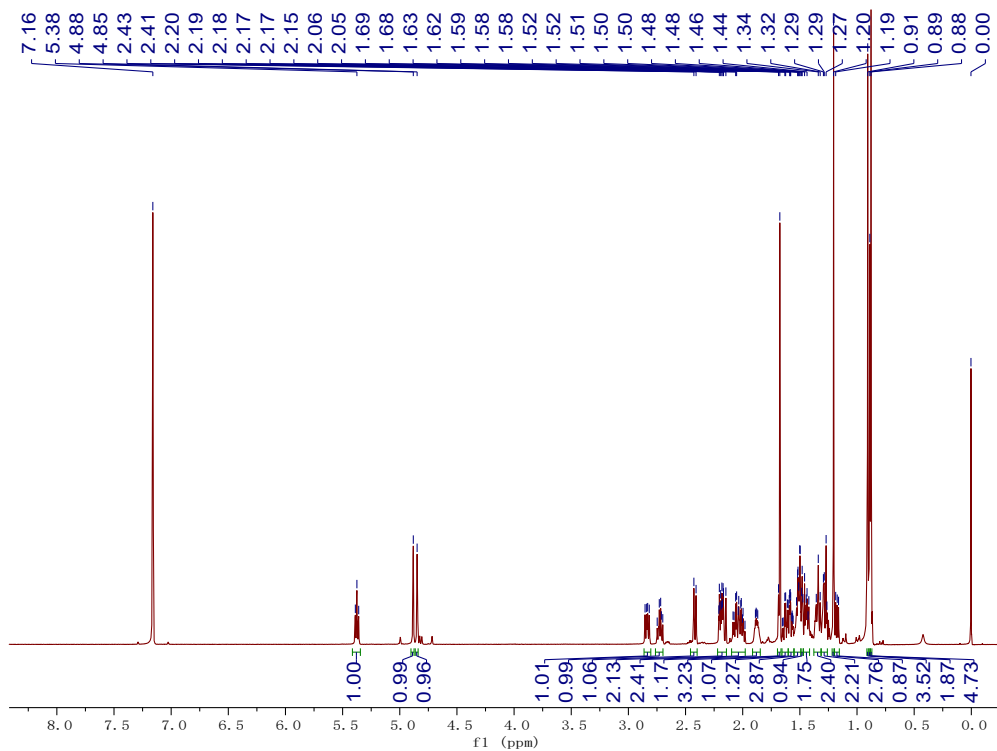

Figure S4.  $^1\text{H}$  NMR (600 MHz,  $\text{C}_6\text{D}_6$ ) spectrum of **1**.

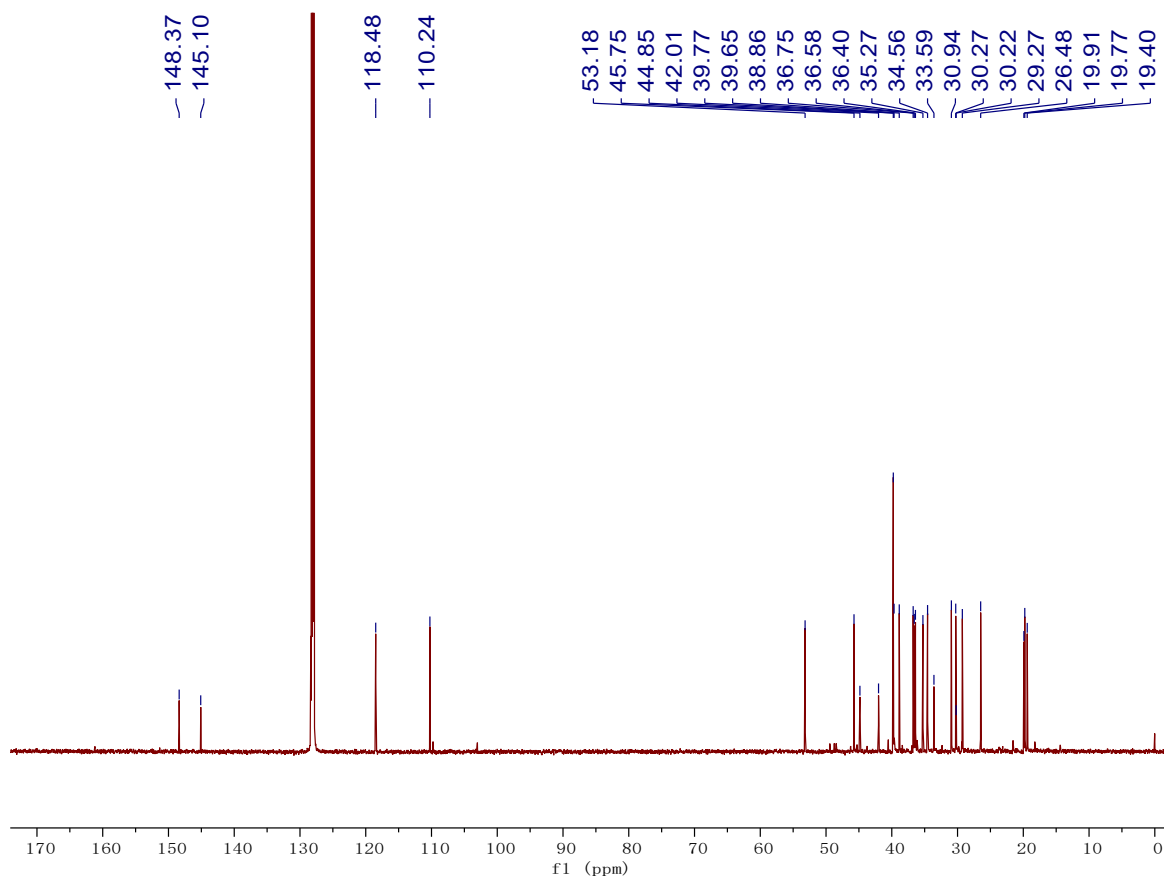

Figure S5.  $^{13}\text{C}$  NMR (150 MHz,  $\text{C}_6\text{D}_6$ ) spectrum of **1**.

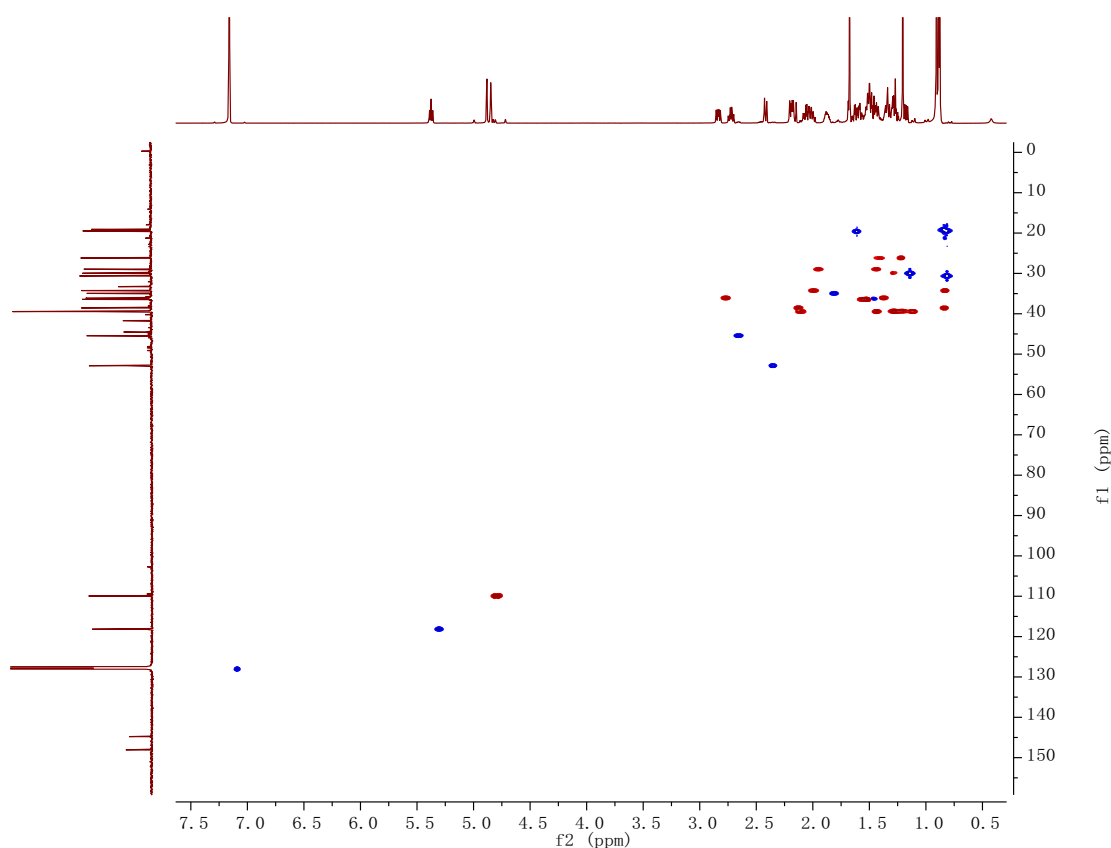

**Figure S6.** HSQC NMR (600 MHz, C<sub>6</sub>D<sub>6</sub>) spectrum of **1**.

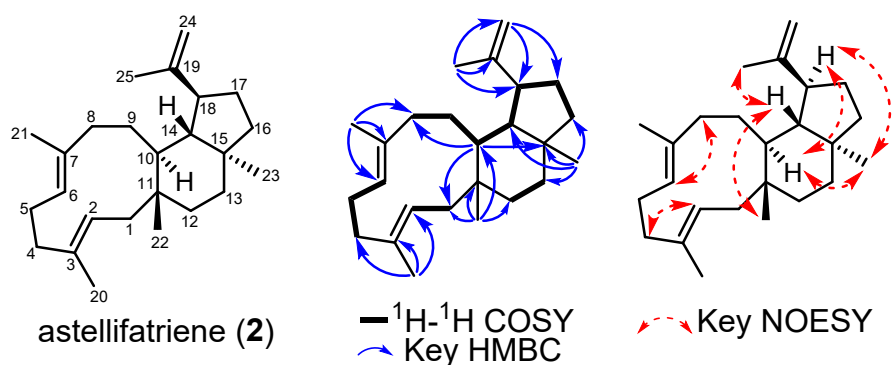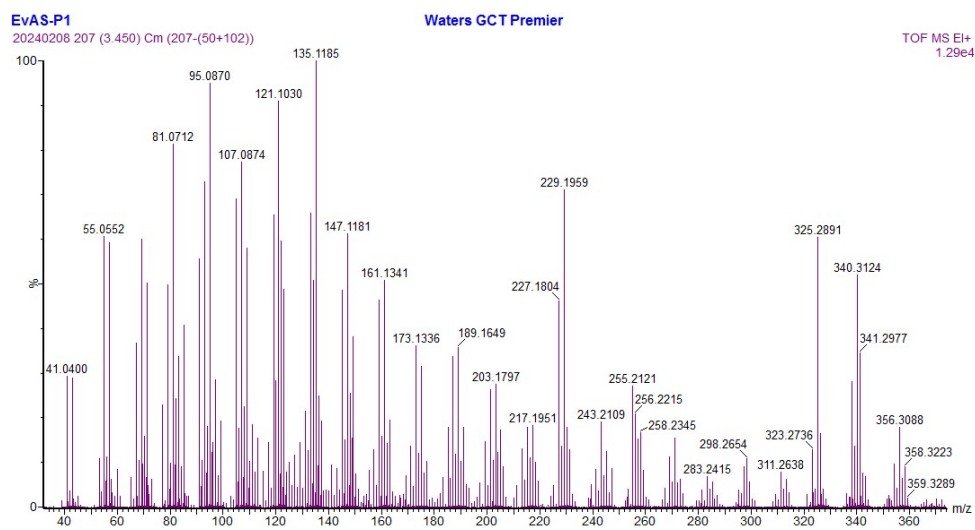

Figure S7. HR-EI-MS spectrum of **2**.

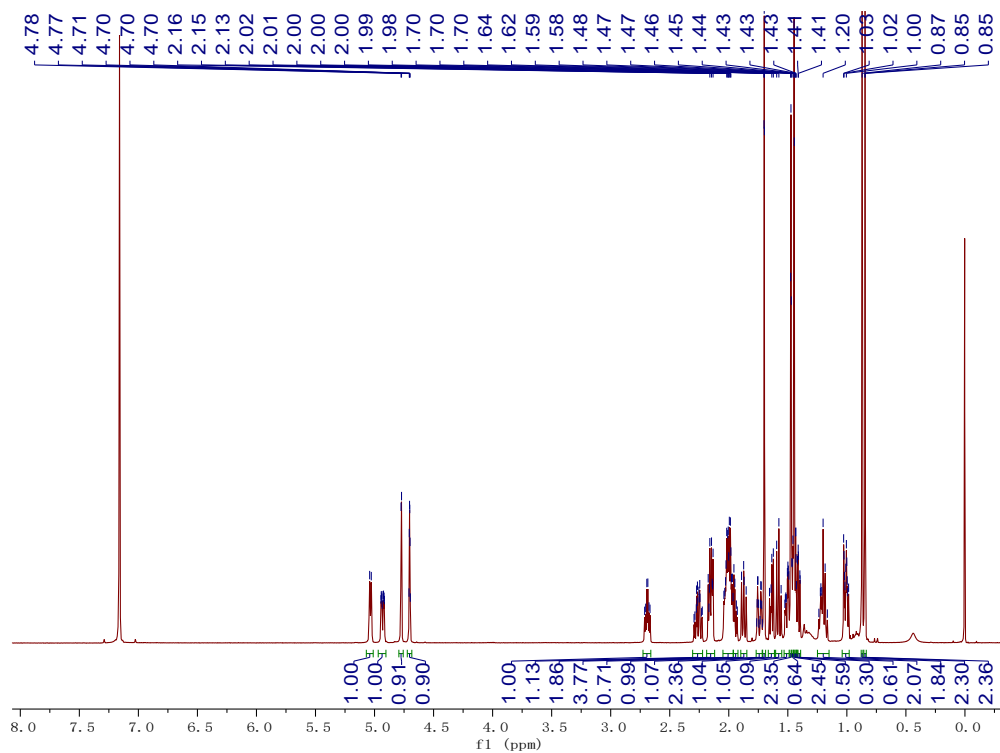

Figure S8.  $^1\text{H}$  NMR (600 MHz,  $\text{C}_6\text{D}_6$ ) spectrum of **2**.

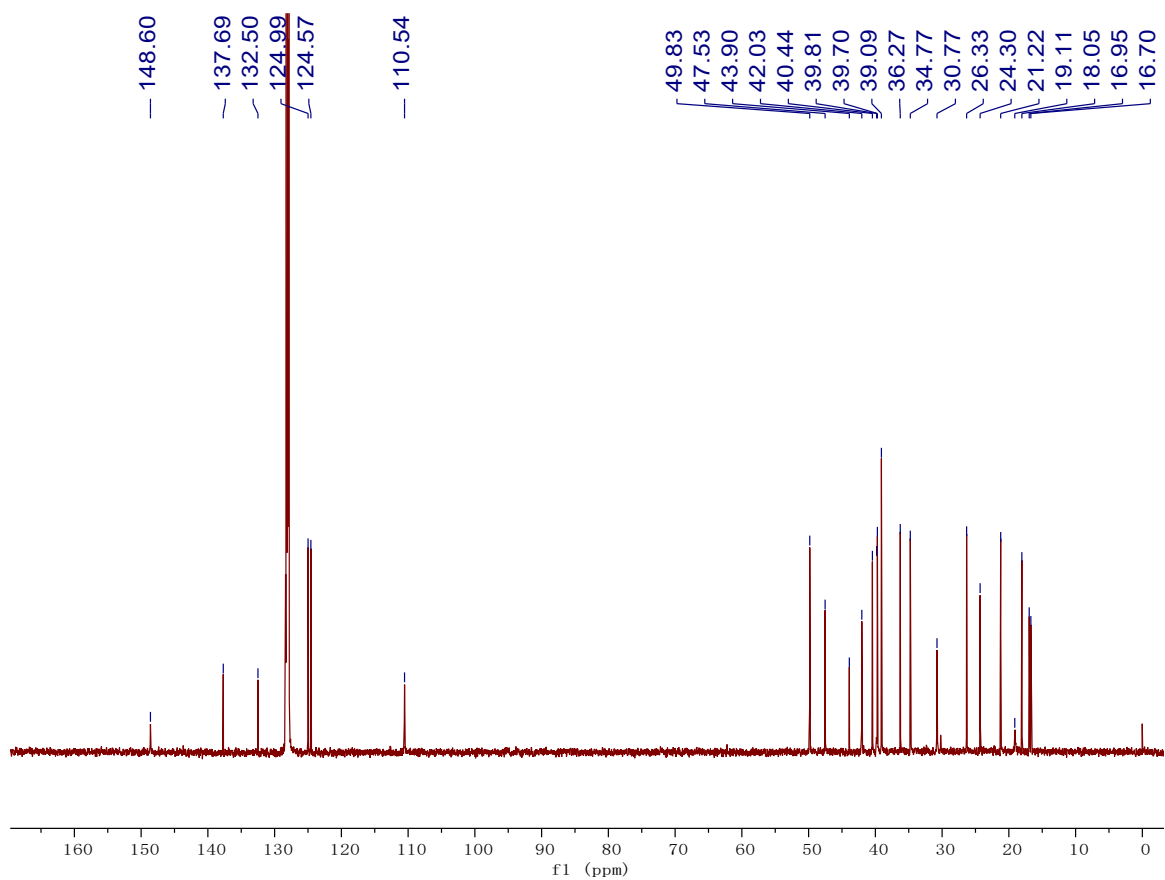

Figure S9.  $^{13}\text{C}$  NMR (150 MHz,  $\text{C}_6\text{D}_6$ ) spectrum of **2**.



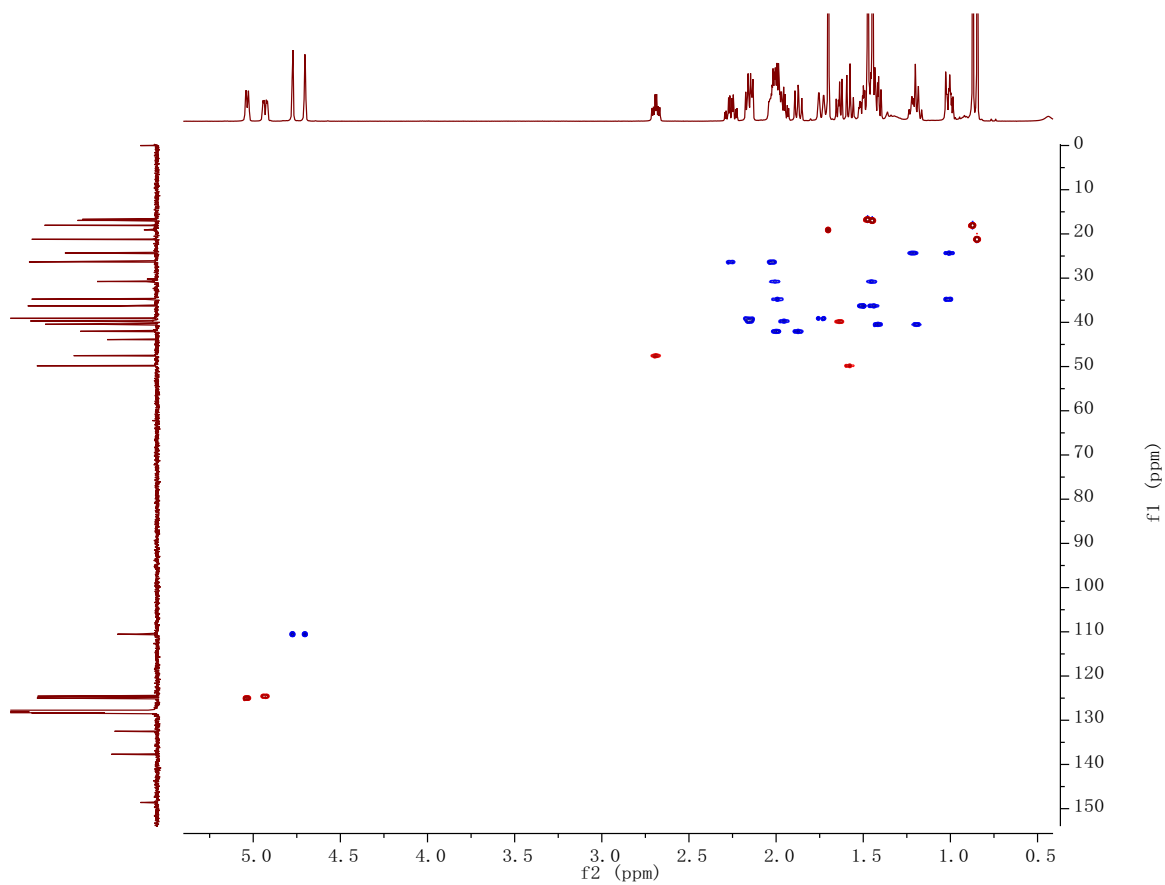

**Figure S10.** HSQC NMR (600 MHz,  $C_6D_6$ ) spectrum of **2**.

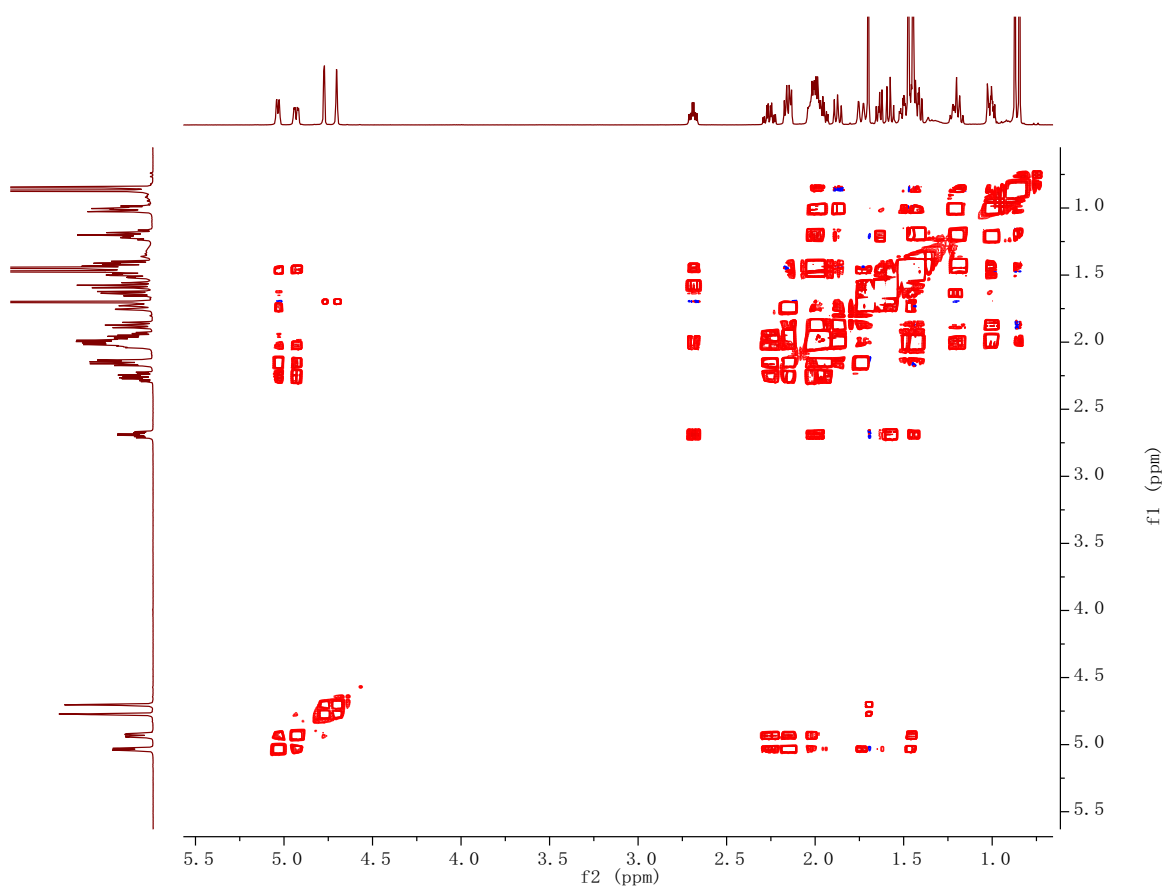

**Figure S11.**  $^1H$ - $^1H$  COSY NMR (600 MHz,  $C_6D_6$ ) spectrum of **2**.

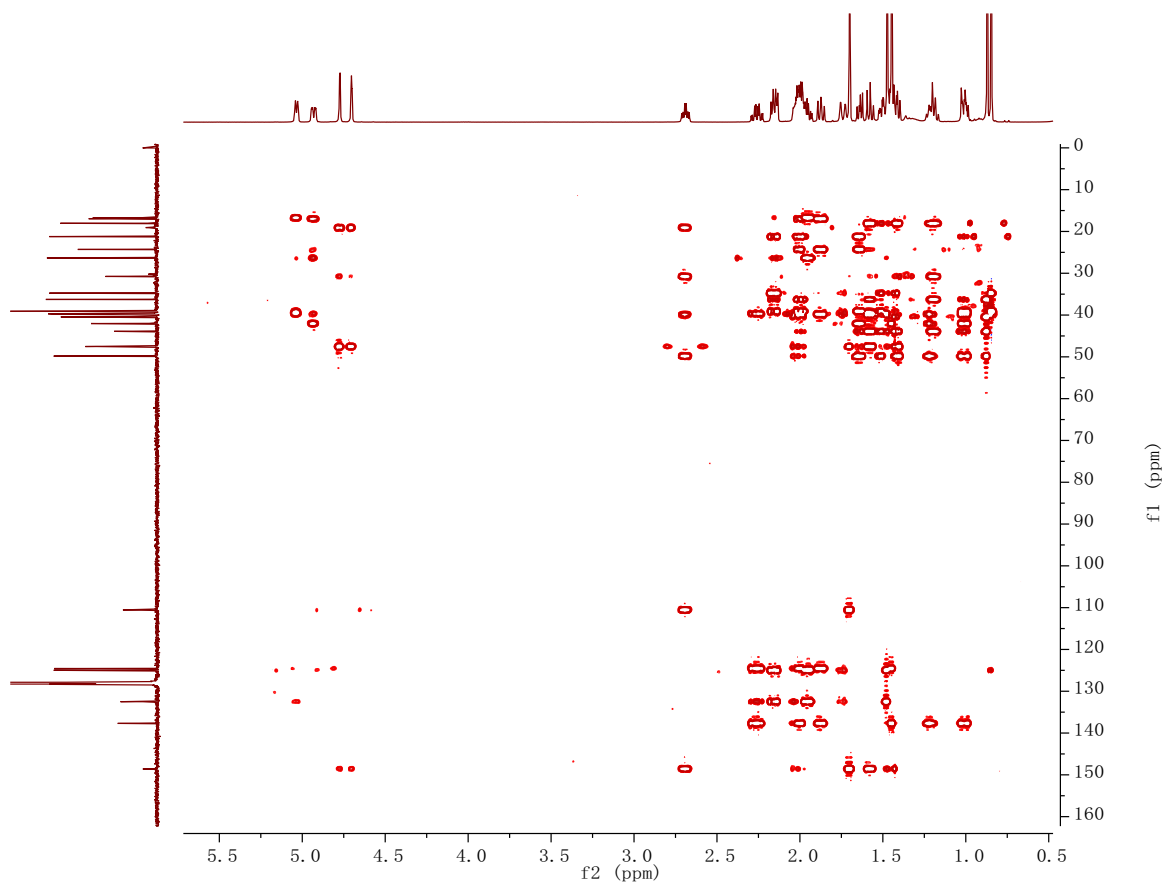

**Figure S12.** HMBC NMR (600 MHz, C<sub>6</sub>D<sub>6</sub>) spectrum of **2**.

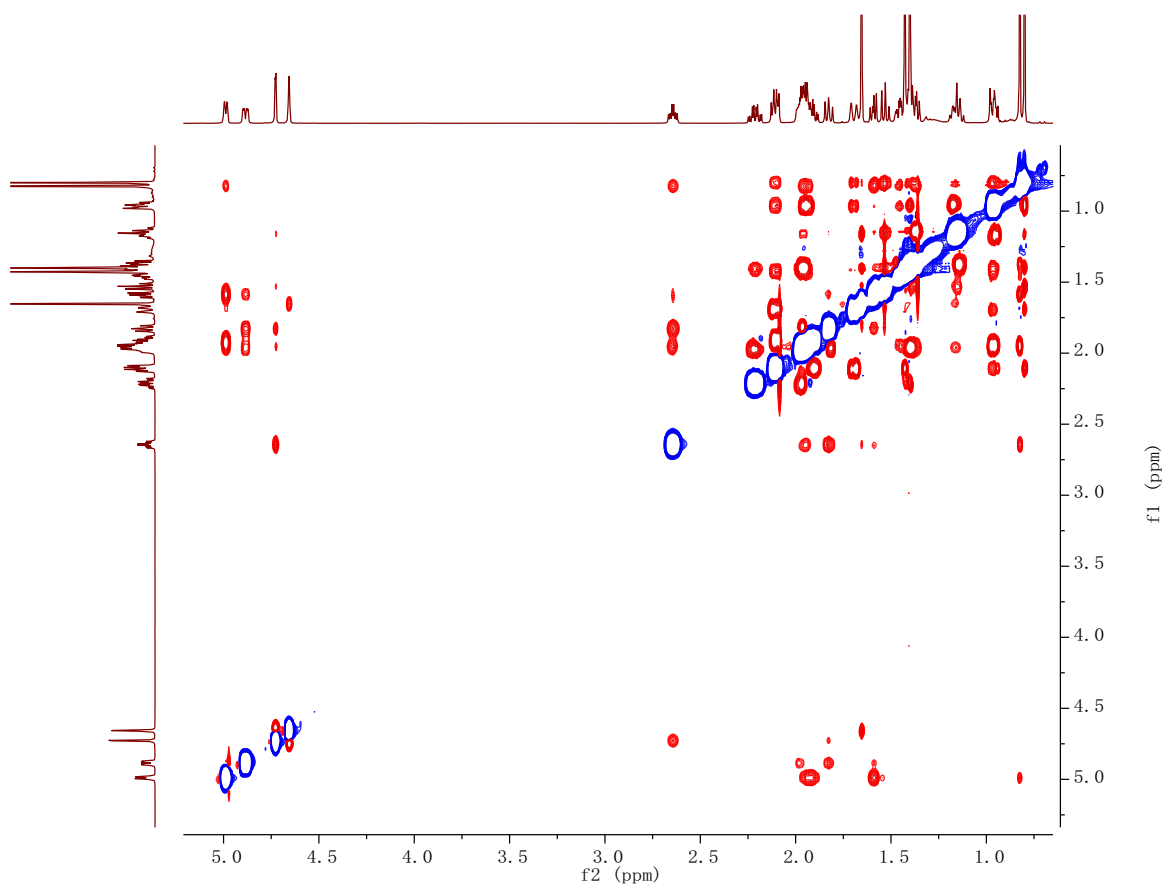

**Figure S13.** NOESY NMR (600 MHz, C<sub>6</sub>D<sub>6</sub>) spectrum of **2**.

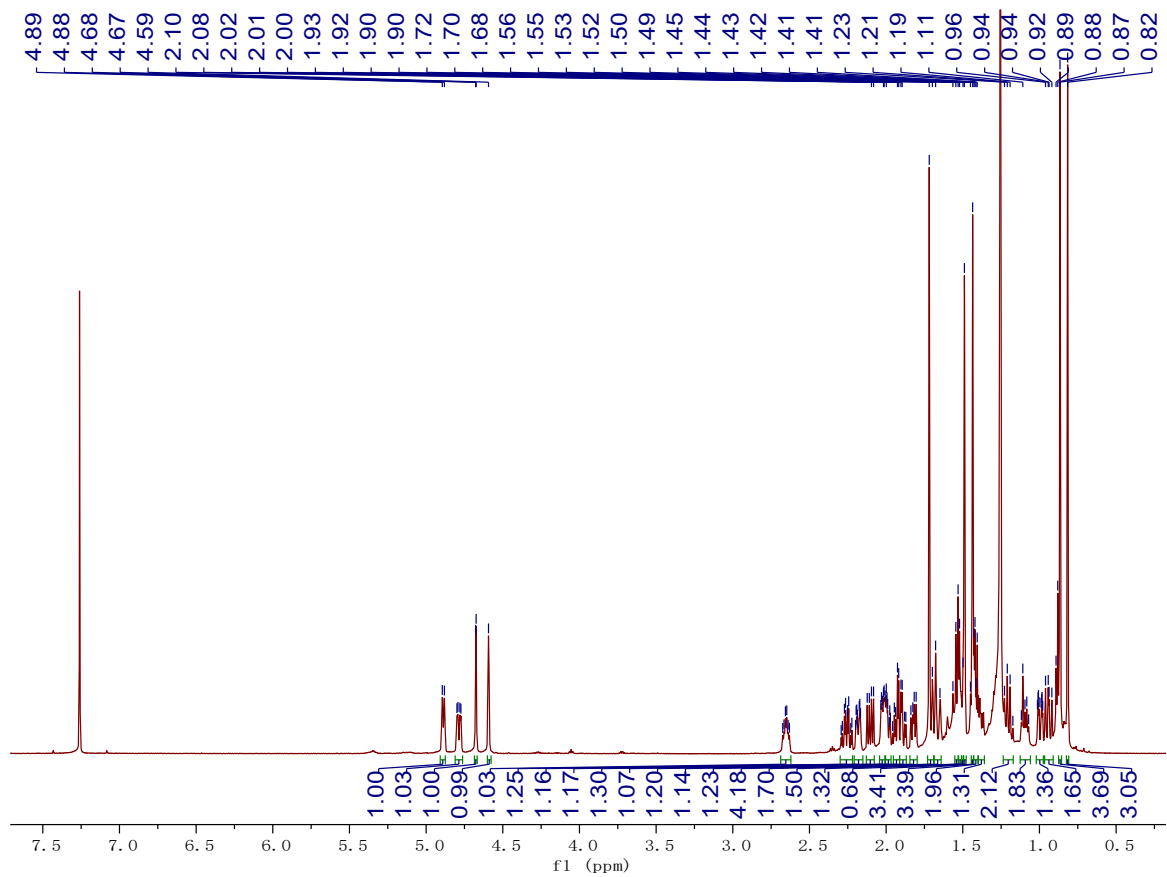

**Figure S14.**  $^1\text{H}$  NMR (600 MHz,  $\text{CDCl}_3$ ) spectrum of **2**.

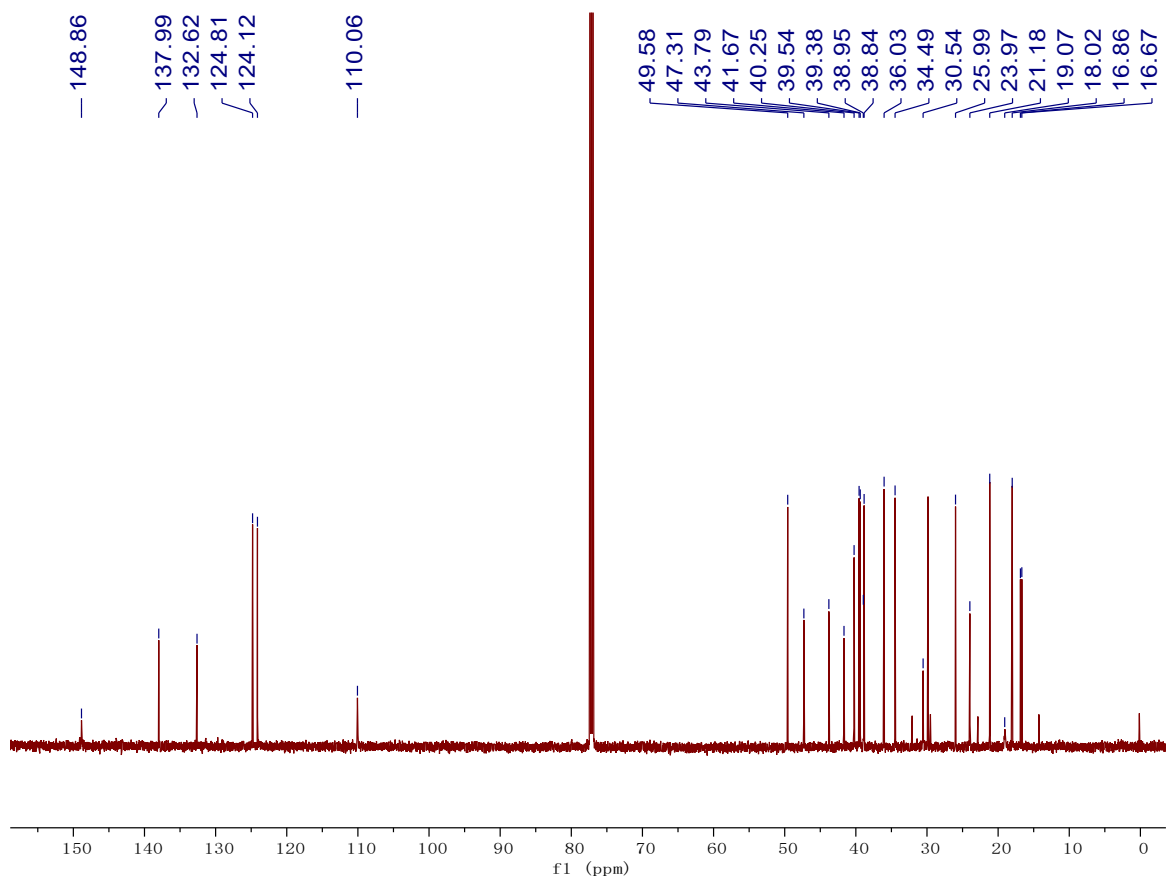

**Figure S15.**  $^{13}\text{C}$  NMR (150 MHz,  $\text{CDCl}_3$ ) spectrum of **2**.

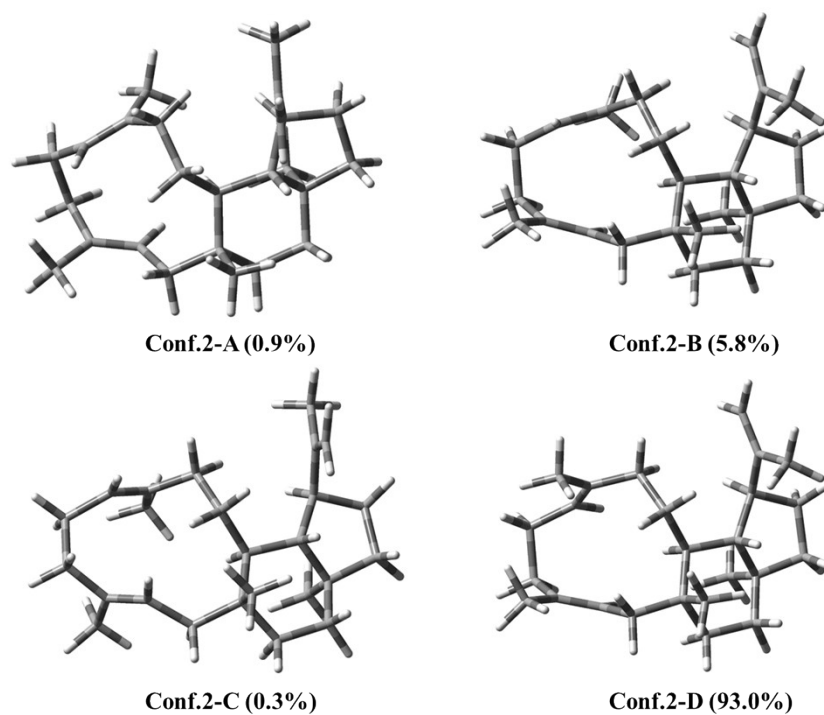

**Figure S16.** The optimized lowest energy conformers for (2*E*,6*E*,10*S*,11*R*,14*S*,15*S*,18*S*)-**2** at the B3LYP/6-31G(d).

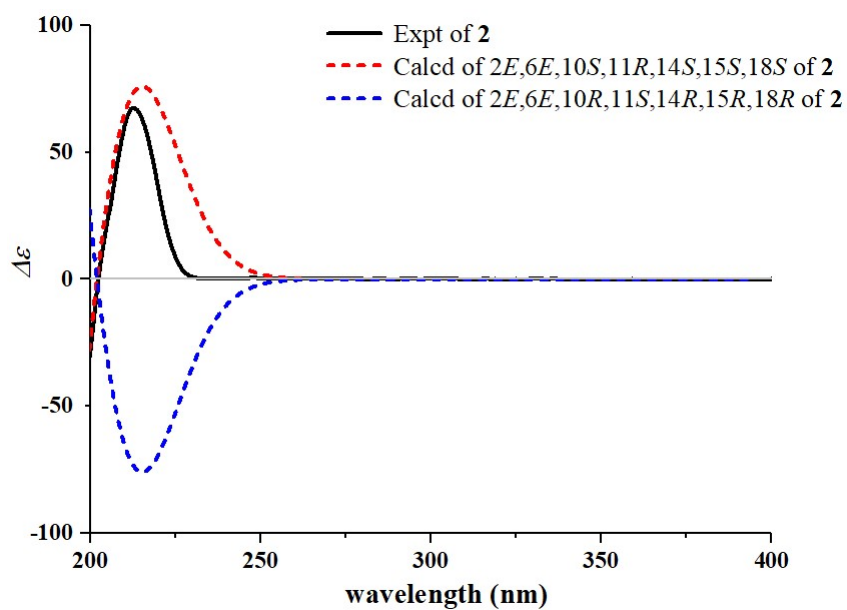

**Figure S17.** Experimental and calculated (B3LYP/6-31G(d,p)) ECD spectra of **2**.

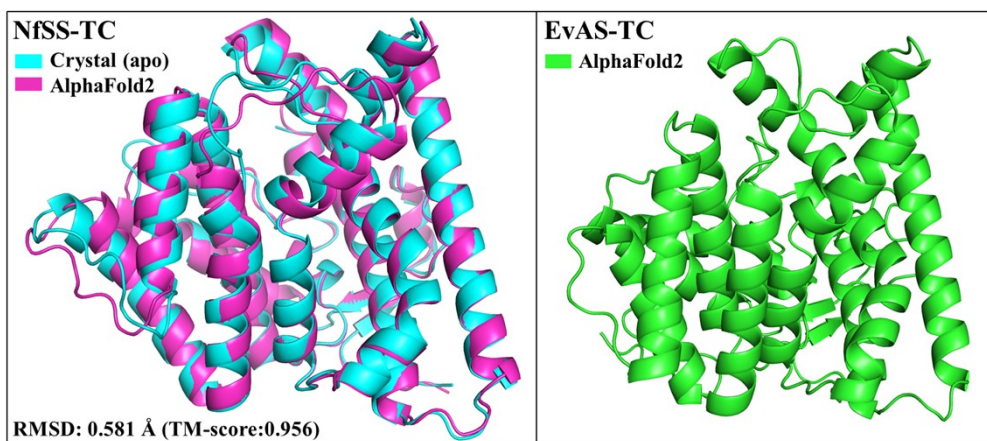

**Figure S18.** Protein models of TC domains of NfSS and EvAS predicted using AlphaFold2. The predicted NfSS-TC is similar with the reported crystal structure (8yla) (TM-score 0.956). The RMSD calculations of the NfSS-TC crystal structure (PDB entry 8yla) was superimposed on the heavy chain of the AlphaFold model of NfSS-TC via the C $\alpha$  atoms of 250 residues.

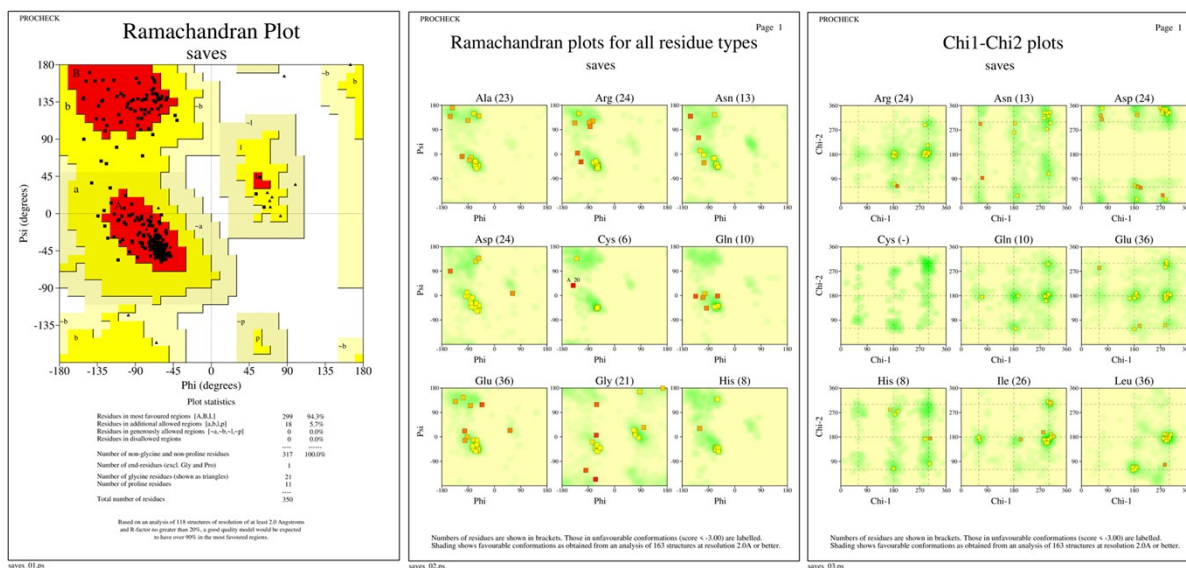

**Figure S19.** The PROCHECK results of EvAS-TC model indicate the good quality of the model predicted using AlphaFold2.

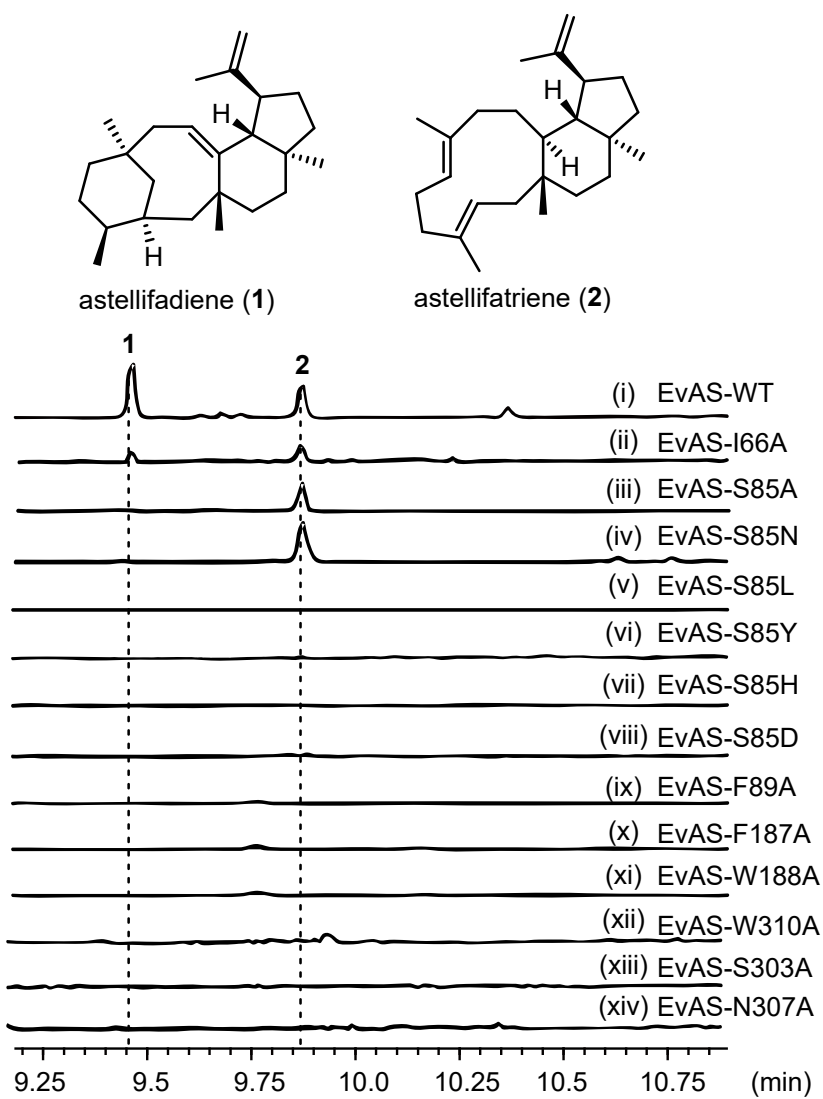

**Figure S20.** The structure of isolated compounds 1–2 and GC-MS profiles of crude extracts obtained from EvAS-WT, and its variants.

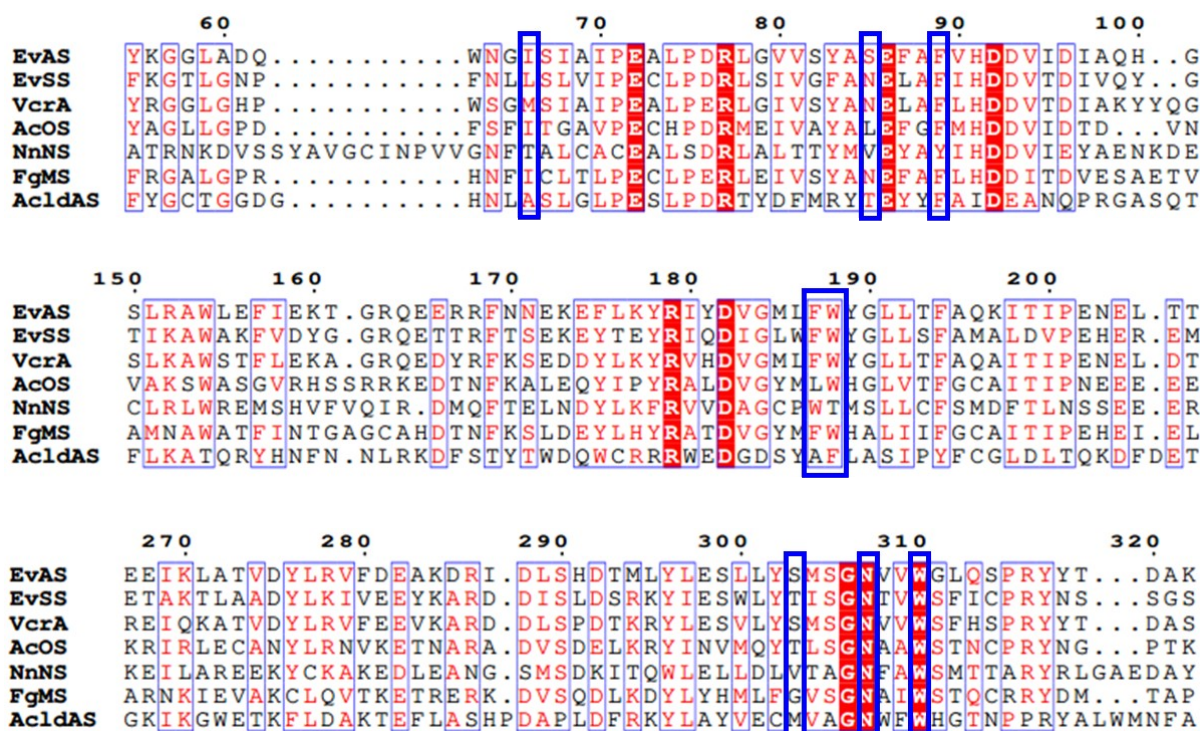

Figure S21. Amino acid sequence alignments of Type B BFTPSs.

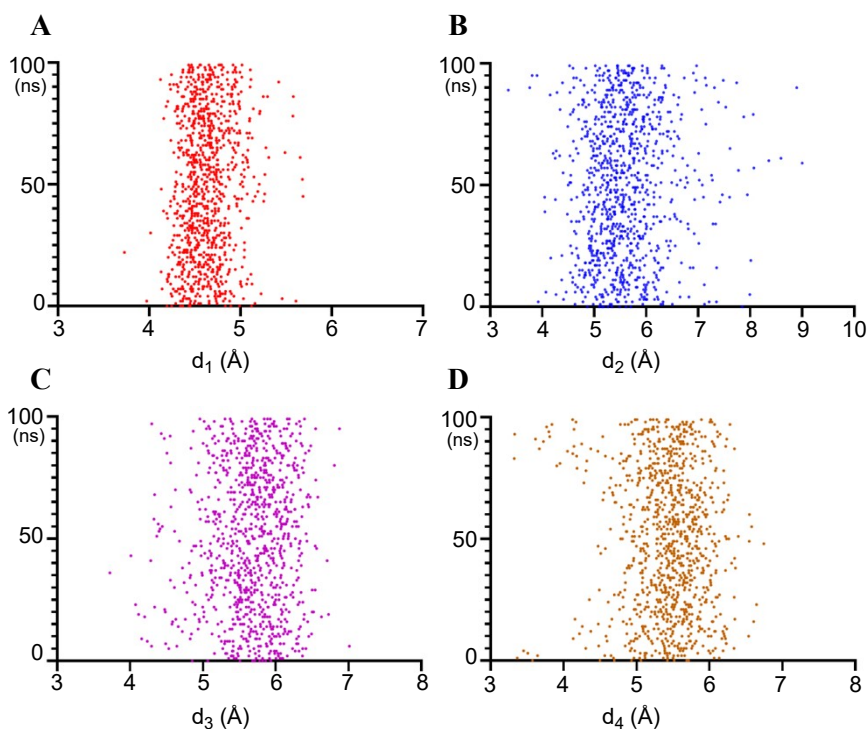

Figure S22. Scatter diagrams of the conformations of the EvAS-WT/IM2 and EvAS-WT/2 complexes. Scatter plots of the conformations of the EvAS-WT/IM2 complex are presented, showing the distances from C19 to W188 (A,  $d_1$ ) and from H24 to S303 (B,  $d_2$ ). And scatter plots display the distances from C3 to the S85 carbonyl oxygen (C,  $d_3$ ) and from C3 to the S85 hydroxyl oxygen (D,  $d_4$ ) for all conformations of the EvAS-WT/2 complex.

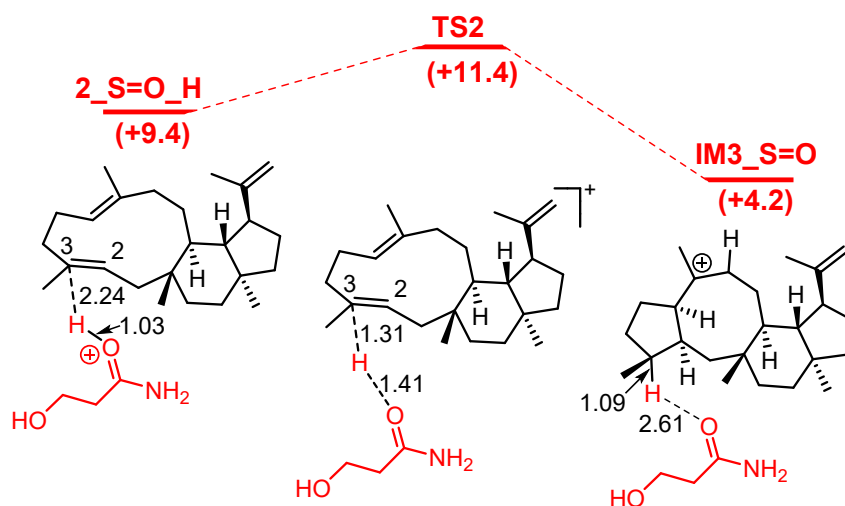

**Figure S23.** The Gibbs free energy profiles (in kcal/mol) for reprotonation sequence mediated by carbonyl oxygen of serine, progressing from state **2** to **IM3**, computed using the mPW1PW91/6-311+G(d,p)//B3LYP/6-31G(d) method relative to **2\_S-O\_H** are shown in red.<sup>17-20</sup>

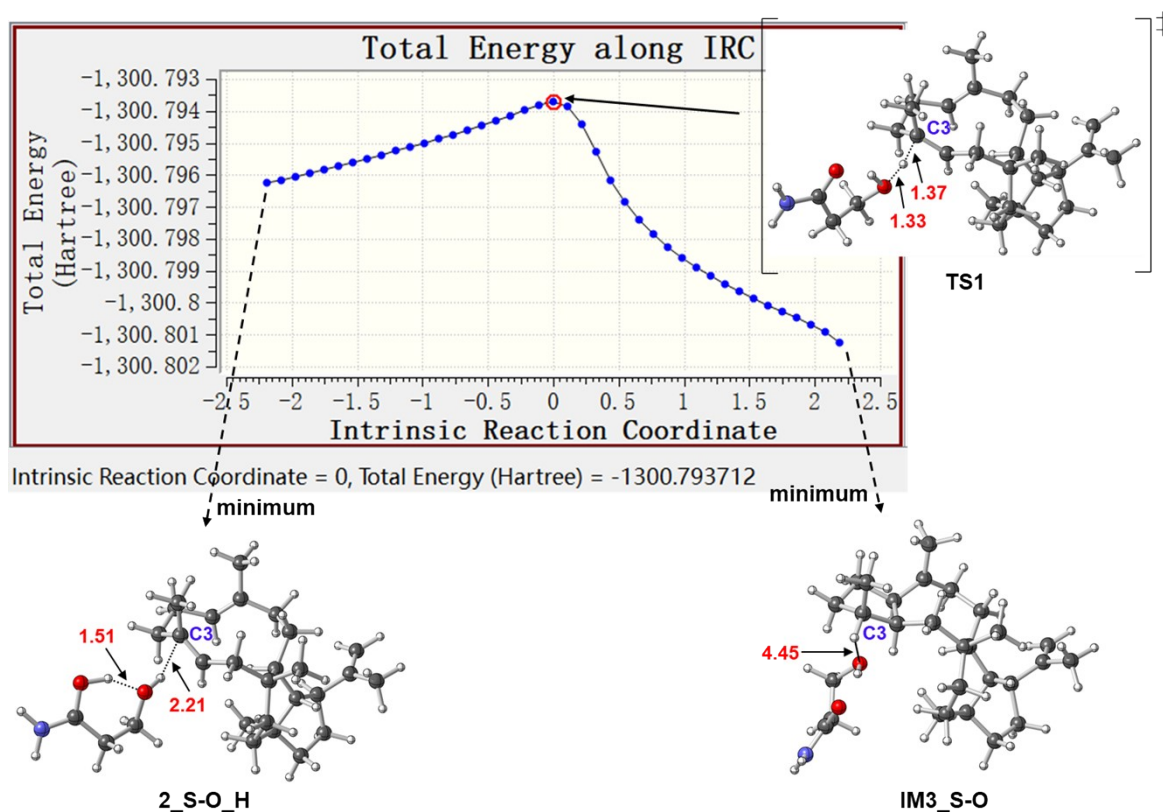

**Figure S24.** Conversion of **2\_S-O\_H** to **IM3\_S-O** from IRC calculations (The red numbers denote interatomic distances (Å), while the blue numbers signify the carbon atom's sequential order).



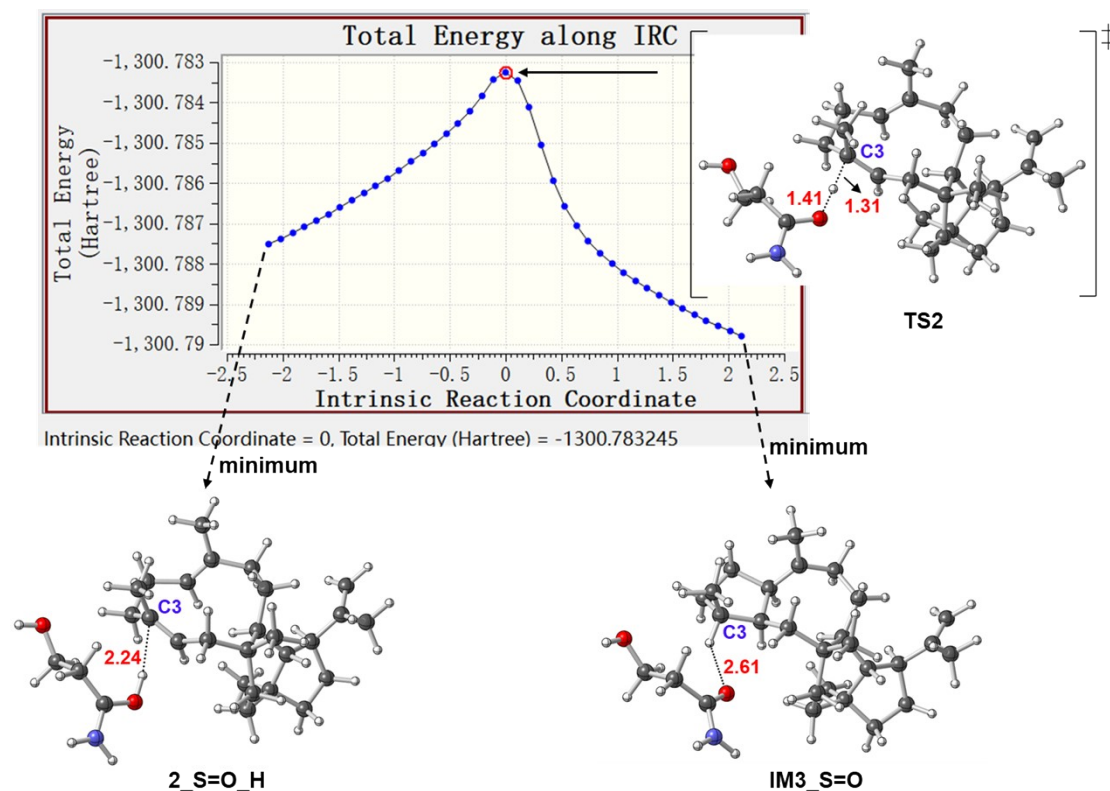

**Figure S25.** Conversion of 2\_S=O\_H to IM3\_S=O from IRC calculations (The red numbers denote interatomic distances (Å), while the blue numbers signify the carbon atom's sequential order).

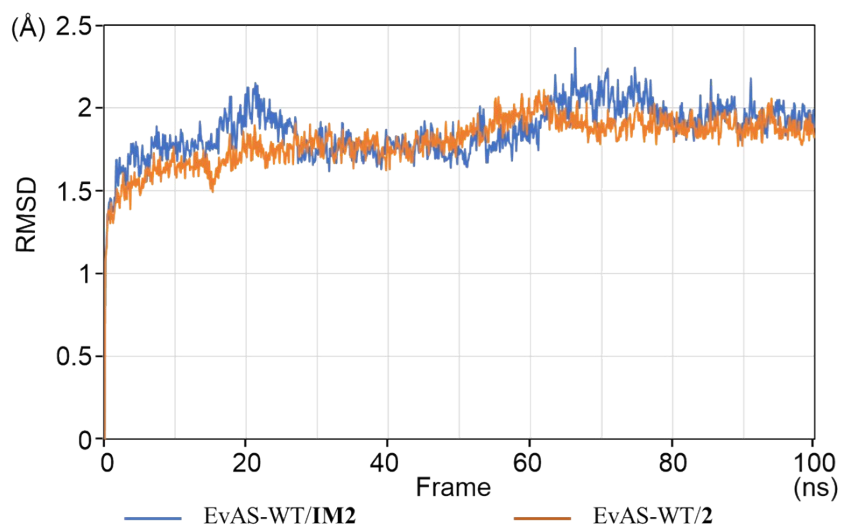

**Figure S26.** The RMSD profiles of the protein backbones of EvAS-WT/IM2, and EvAS-WT/2, during 100 ns (x 2) molecular dynamics simulations.

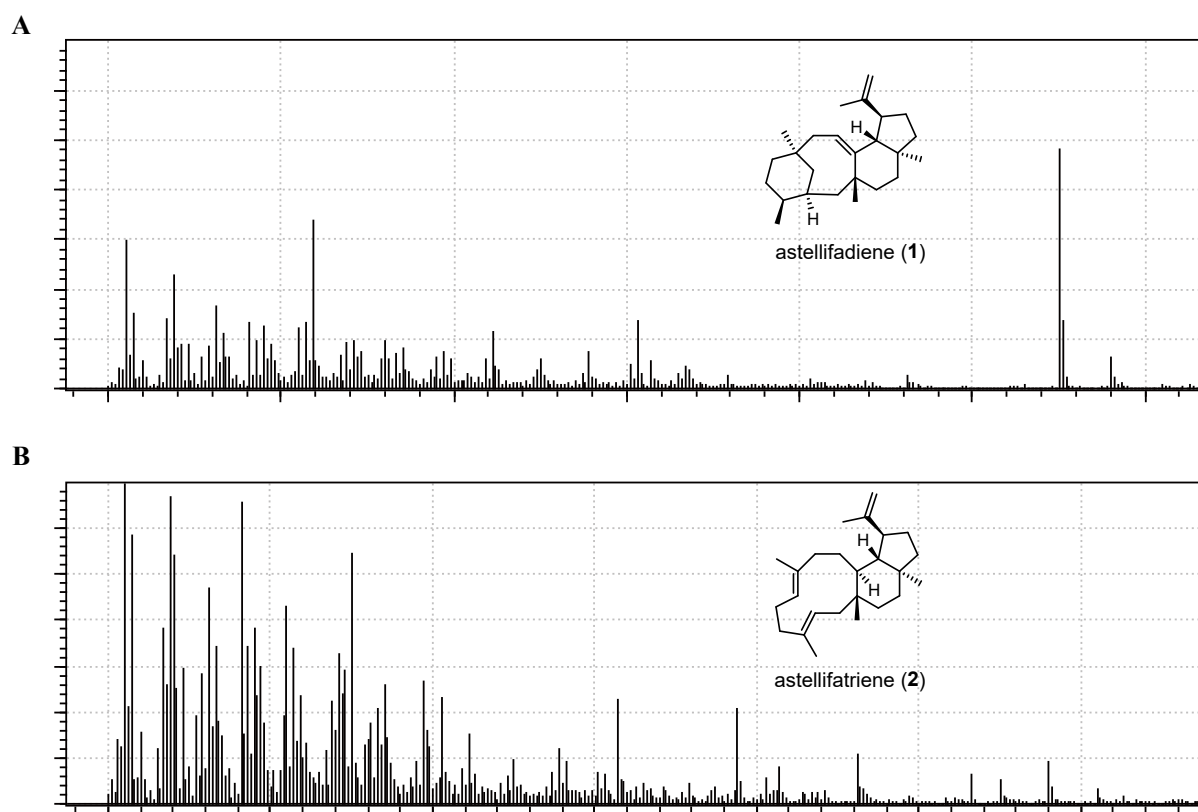

**Figure S27.** Mass spectra of (A) astellifadiene (1) and (B) astellifatriene (2) from the transformants.

## SUPPORTING TABLES

**Table S1.** The bifunctional terpene synthases characterized from fungi and their products.

| No. | Protein | Accession  | Species                                         | Products                                                       | Ref, year            |
|-----|---------|------------|-------------------------------------------------|----------------------------------------------------------------|----------------------|
| 1   | AcOS    | A1C8C3.1   | <i>Aspergillus clavatus</i>                     | Ophiobolin F,<br>Ophiobolane 1, Ophiobolane 2,<br>Clavaphyllen | <sup>21</sup> , 2013 |
| 2   | Au8003  | QIH97826.1 | <i>Aspergillus ustus</i>                        | Ophiobolin F                                                   | <sup>22</sup> , 2016 |
| 3   | BmOS    | MW798226   | <i>Bipolaris maydis</i>                         | Ophiobolin F                                                   | <sup>23</sup> , 2021 |
| 4   | AuOS    | MW798208   | <i>Aspergillus ustus</i>                        | Ophiobolin F                                                   | <sup>23</sup> , 2021 |
| 5   | PfVS    | MW798216   | <i>Pestalotiopsis fici</i>                      | Clavaphyllene, Variculatriene<br>A, $\beta$ -Geranylarnesene   | <sup>23</sup> , 2021 |
| 6   | EvVS    | LC063849   | <i>Emericella varicolor</i>                     | Variediene,<br>(2E)- $\alpha$ -cericerene                      | <sup>24</sup> , 2015 |
| 7   | EvAS    | LC113889   | <i>Emericella varicolor</i><br>NBRC 32302       | Astellifadiene                                                 | <sup>1</sup> , 2016  |
| 8   | BmTS1   | EMD84919   | <i>Bipolaris</i><br><i>maydis</i> ATCC48331     | Bm1                                                            | <sup>25</sup> , 2017 |
| 9   | BmTS2   | EMD93209   | <i>Bipolaris</i><br><i>maydis</i> ATCC48331     | Bm2                                                            | <sup>25</sup> , 2017 |
| 10  | BmTS3   | EMD93704   | <i>Bipolaris</i><br><i>maydis</i> ATCC48331     | Bm3                                                            | <sup>25</sup> , 2017 |
| 11  | CfBS    | MW798209   | <i>Colletotrichum fioriniae</i>                 | Bm3                                                            | <sup>23</sup> , 2021 |
| 12  | MpBS    | MW798229   | <i>Macrophomina phaseolina</i>                  | Bm3                                                            | <sup>23</sup> , 2021 |
| 13  | PbTS1   | LC274619   | <i>Phoma betae</i> PS-13                        | Pb1                                                            | <sup>25</sup> , 2017 |
| 14  | BtcAco  | N4V6D4.1   | <i>Colletotrichum orbulare</i>                  | Pb1                                                            | <sup>26</sup> , 2018 |
| 15  | ChPS    | MW798213   | <i>Colletotrichum</i><br><i>higginsianum</i>    | Pb1                                                            | <sup>23</sup> , 2021 |
| 16  | CsPS    | MW798219   | <i>Colletotrichum siamense</i>                  | Pb1                                                            | <sup>23</sup> , 2021 |
| 17  | CoFS    | MW798210   | <i>Colletotrichum orbiculare</i>                | Pb1, Fusaproliferene                                           | <sup>23</sup> , 2021 |
| 18  | CiGS    | MW798200   | <i>Colletotrichum incanum</i>                   | Pb1, $\beta$ -Geranylarnesene                                  | <sup>23</sup> , 2021 |
| 19  | FgMS    | AQY56777   | <i>Fusarium graminearum</i>                     | Mangiedien, Variocoltetraene                                   | <sup>27</sup> , 2017 |
| 20  | NfSS    | EAW16201   | <i>Neosartorya fischeri</i>                     | Sesterfisherol                                                 | <sup>28</sup> , 2015 |
| 21  | AaSS    | MW798204   | <i>Alternaria alternata</i>                     | Sesterfisherol                                                 | <sup>23</sup> , 2021 |
| 22  | CiSS    | MW798201   | <i>Colletotrichum incanum</i>                   | Sesterorbiculene                                               | <sup>23</sup> , 2021 |
| 23  | CoSS    | MW798211   | <i>Colletotrichum orbiculare</i>                | Sesterorbiculene                                               | <sup>23</sup> , 2021 |
| 24  | CgSS    | MW798218   | <i>Colletotrichum</i><br><i>gloeosporioides</i> | Sesterorbiculene                                               | <sup>23</sup> , 2021 |
| 25  | ChVS    | MW798212   | <i>Colletotrichum</i><br><i>higginsianum</i>    | (-)-Variculatriene B                                           | <sup>23</sup> , 2021 |

|    |                |                          |                                             |                                      |                                   |
|----|----------------|--------------------------|---------------------------------------------|--------------------------------------|-----------------------------------|
| 26 | PoVS           | MW798215                 | <i>Pyricularia oryzae</i>                   | (-)-Variculatriene B                 | <sup>23</sup> , 2021              |
| 27 | LmVS           | MW798221                 | <i>Lophiostoma macrostomum</i>              | (-)-Variculatriene B                 | <sup>23</sup> , 2021              |
| 28 | CsVS           | MW798223                 | <i>Colletotrichum sublineola</i>            | (-)-Variculatriene B                 | <sup>23</sup> , 2021              |
| 29 | PoVS           | MW798227                 | <i>Pyricularia oryzae</i>                   | (-)-Variculatriene B                 | <sup>23</sup> , 2021              |
| 30 | TtPS           | MW798214                 | <i>Thermothielavioides terrestris</i>       | Preasperterpenoid A                  | <sup>23</sup> , 2021              |
| 31 | PvPS           | LC228602                 | <i>Penicillium verruculosum</i>             | Preasperterpenoid A                  | <sup>29</sup> , 2017              |
| 32 | AsTC           | MK140602                 | <i>Talaromyces wortmannii</i>               | Preasperterpenoid A                  | <sup>30</sup> , 2019              |
| 33 | TvPS           | MW798225                 | <i>Talaromyces verruculosus</i>             | Preasperterpenoid A                  | <sup>23</sup> , 2021              |
| 34 | PaSS           | MW798222                 | <i>Penicillium arizonense</i>               | Sesterbrasiliatriene                 | <sup>23</sup> , 2021              |
| 35 | PbSS           | LC228601                 | <i>Penicillium brasilianum</i>              | Sesterbrasiliatriene                 | <sup>29</sup> , 2017              |
| 36 | ChBS           | MW798232                 | <i>Colletotrichum higginsianum</i>          | Brassiteraene A,<br>Brassiteraene B  | <sup>23</sup> , 2021              |
| 37 | ZbSS           | MW798202                 | <i>Zyoseptoria brevis</i>                   | Sesterevisene                        | <sup>23</sup> , 2021              |
| 38 | AnGS           | MW798203                 | <i>Aspergillus niger</i>                    | Geranylfarnesol                      | <sup>23</sup> , 2021              |
| 39 | PgGS           | MW798206                 | <i>Penicillium griseofulvum</i>             | Geranylfarnesol                      | <sup>23</sup> , 2021              |
| 40 | PgFS           | MW798217                 | <i>Pyricularia grisea</i>                   | Geranylfarnesol                      | <sup>23</sup> , 2021              |
| 41 | TaGS           | MW798220                 | <i>Thielavia arenaria</i>                   | Geranylfarnesol                      | <sup>23</sup> , 2021              |
| 42 | AaGS           | MW798231                 | <i>Aspergillus aculeatus</i>                | Geranylfarnesol                      | <sup>23</sup> , 2021              |
| 43 | CsSS           | MW685620                 | <i>Cytospora schulzeri</i> 12,565           | Schultriene                          | <sup>31</sup> , 2022              |
| 44 | NnNS           | MW685621                 | <i>Nectria nigrescens</i> 12,199            | Nigtetraene                          | <sup>31</sup> , 2022              |
| 45 | EvSS           | LC073704                 | <i>Emericella varicolor</i>                 | Stellata-2,6,19-triene               | <sup>32</sup> , 2015              |
| 46 | EvQS           | LC155210                 | <i>Emericella varicolor</i>                 | Quannulatene                         | <sup>33</sup> , 2016              |
| 47 | AcIdAS         | CEL06489.1               | <i>Aspergillus calidoustus</i><br>CBS121601 | Asperterpenol A                      | <sup>34</sup> , 2020              |
| 48 | AuAS           | MW387950                 | <i>Aspergillus ustus</i> 094102             | Aspergildiene A, Aspergilols<br>A–D  | <sup>35</sup> , 2021              |
| 49 | FoFS           | MW446505                 | <i>Fusarium oxysporum</i>                   | Fusoxypenes A-C, (-)-<br>astellatene | <sup>36</sup> , 2021              |
| 50 | AtAS<br>(StTA) | ATEG_03568<br>(KX449366) | <i>Aspergillus terreus</i>                  | Preasperterpenacid I                 | <sup>36, 37</sup> , 2021,<br>2017 |
| 51 | BsPS           | NA                       | <i>Bipolaris sorokiniana</i>                | Preterpestacin I,<br>Aspergiltriene, | <sup>38</sup> , 2021              |
| 52 | AcAS           | NA                       | <i>Aspergillus calidoustus</i>              | Aspergildienes A–D,<br>calidoustene  | <sup>39</sup> , 2022              |
| 53 | AaTPS1         | XP_018386201             | <i>Alternaria alternata</i> MB-<br>30       | sesteraltererol                      | <sup>40</sup> , 2023              |
| 54 | AaTPS2         | XP_018380014             | <i>Alternaria alternata</i> MB-<br>30       | preterpestacin I                     | <sup>40</sup> , 2023              |
| 55 | PsTA           | NA                       | <i>Penicillium herquei</i> TJ403-<br>A1     | Penisentene                          | <sup>41</sup> , 2022              |
| 56 | VrcA           | XP_020054773.1           | <i>E. varicolor</i> NBRC 32302              | Variecoladiene                       | <sup>42</sup> , 2024              |
| 57 | EmES           | WWS34622.1               | <i>Emericellasp</i>                         | Emerindanol A and B                  | <sup>43</sup> , 2024              |

|    |      |              |                                             |                                                                  |          |
|----|------|--------------|---------------------------------------------|------------------------------------------------------------------|----------|
| 58 | PaFS | A2PZA5.1     | <i>Phomopsis amygdali</i>                   | Fusicocca-2,10(14)-diene                                         | 44, 2007 |
| 59 | AbFS | AB465604     | <i>Alternaria brassicicola</i>              | Fusicocca 2,10(14)-diene                                         | 45, 2008 |
| 60 | CgDS | P9WEV7.1     | <i>Colletotrichum gloeosporioides ES026</i> | (1R)- $\delta$ -Araneosene<br>(5R,12R,14S)-dolasta-1(15),8-diene | 46, 2018 |
| 61 | CpPS | NA           | <i>Clitopilus passeckerianus</i>            | Premutilin                                                       | 47, 2018 |
| 62 | PaPS | NA           | <i>Phomopsis amygdali</i>                   | Phomopsene                                                       | 48, 2009 |
| 63 | PcCS | LC411963     | <i>Penicillium chrysogenum</i>              | Penichrysol                                                      | 49, 2018 |
| 64 | PrDS | W6QAE7.1     | <i>Penicillium roqueforti</i>               | Penichrysol                                                      | 50, 2018 |
| 65 | DvVS | ON911568     | <i>Didymosphaeria variabile 17020</i>       | Variediene,<br>Neoflexibilene,<br>Neovariediene                  | 51, 2022 |
| 66 | TndC | NA           | <i>Aspergillus flavipes</i>                 | Talarodiene                                                      | 52, 2022 |
| 67 | TlnA | NA           | <i>Talaromyces stipitatus</i>               | Talarodiene,<br>Talarodiene B.                                   | 53, 2024 |
| 68 | AfAS | BK065787     | <i>Aspergillus fumigatiaffinis</i>          | Asperfumene                                                      | 54, 2024 |
| 69 | MpMS | EKG20455.1   | <i>Macrophomina phaseolina</i>              | Macrophomene                                                     | 55, 2022 |
| 70 | TvTS | KUL85185.1   | <i>Talaromyces verruculosus</i>             | Talaropentaene                                                   | 55, 2022 |
| 71 | CgCS | A0A8H4CUY8.1 | <i>Colletotrichum gloeosporioides</i>       | Colleterpenol                                                    | 55, 2022 |

NA indicates not available.

**Table S2.** Comparison of  $^1\text{H}$  (600 MHz) and  $^{13}\text{C}$  (150 MHz) NMR (in benzene- $d_6$ ) data of **1** to those of astellifadiene (500 MHz, in benzene- $d_6$ ) in the literature.<sup>1</sup>

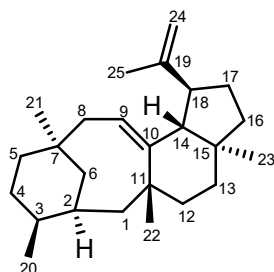

**astellifadiene (1)**

| Pos. | $\delta_{\text{H}}$ mult ( $J$ in Hz), <b>1</b> | $\delta_{\text{C}}$ , <b>1</b> | $\delta_{\text{H}}$ mult ( $J$ in Hz),<br>astellifadiene | $\delta_{\text{C}}$ ,<br>astellifadiene |
|------|-------------------------------------------------|--------------------------------|----------------------------------------------------------|-----------------------------------------|
| 1    | 1.18, dd (15.3, 6.7);<br>2.17, m                | 39.7                           | 1.18, dd (15.1, 6.7);<br>2.17, dd (15.1, 12.9)           | 39.7                                    |
| 2    | 1.88, m                                         | 35.3                           | 1.88, m                                                  | 35.2                                    |
| 3    | 1.51, m                                         | 36.5                           | 1.51, m                                                  | 36.5                                    |
| 4    | 1.29, m;<br>1.53, m                             | 26.4                           | 1.29, m;<br>1.53, m                                      | 26.4                                    |
| 5    | 1.28, m;<br>1.36, m                             | 39.7                           | 1.28, m;<br>1.36, m                                      | 39.7                                    |
| 6    | 0.90, m;<br>2.20, m                             | 38.8                           | 0.90, m;<br>2.19, brd (13.9)                             | 38.8                                    |
| 7    | -                                               | 33.6                           | -                                                        | 33.5                                    |
| 8    | 1.43, m;<br>2.84, dd (13.7, 8.3)                | 36.4                           | 1.43, m;<br>2.83, dd (13.5, 8.4)                         | 36.4                                    |
| 9    | 5.38, m                                         | 118.4                          | 5.37, brt (8.4)                                          | 118.4                                   |
| 10   | -                                               | 145.1                          | -                                                        | 145.0                                   |
| 11   | -                                               | 42.0                           | -                                                        | 42.0                                    |
| 12   | 2.07, td (13.6, 5.1);<br>0.90, m                | 34.5                           | 2.06, td (13.9, 5.1);<br>0.88, m                         | 34.5                                    |
| 13   | 1.58, m;<br>1.63, m                             | 36.7                           | 1.58, m;<br>1.63, td (12.9, 3.9)                         | 36.7                                    |
| 14   | 2.42, d (11.4)                                  | 53.2                           | 2.42, d (11.2)                                           | 53.1                                    |
| 15   | -                                               | 44.8                           | -                                                        | 44.8                                    |
| 16   | 1.34, m; 1.51, m                                | 39.7                           | 1.32, m; 1.49, m                                         | 39.7                                    |
| 17   | 1.48, m; 2.02, m                                | 29.3                           | 1.49, m; 2.01, m                                         | 29.2                                    |
| 18   | 2.72, m                                         | 45.7                           | 2.72, td (10.7, 7.6)                                     | 45.7                                    |
| 19   | -                                               | 148.4                          | -                                                        | 148.3                                   |
| 20   | 0.90, d (6.9)                                   | 19.7                           | 0.88, d (6.7)                                            | 19.7                                    |
| 21   | 0.88, s                                         | 30.9                           | 0.88, s                                                  | 30.9                                    |
| 22   | 1.20, s                                         | 30.2                           | 1.20, s                                                  | 30.2                                    |
| 23   | 0.91, s                                         | 19.4                           | 0.91, s                                                  | 19.4                                    |
| 24   | 4.85, brs;<br>4.88, brs                         | 110.2                          | 4.85, brs;<br>4.88, brs                                  | 110.2                                   |

25

1.68, s

19.9

1.67, s

19.9

---

**Table S3.** 1D and 2D NMR Data of **2**.

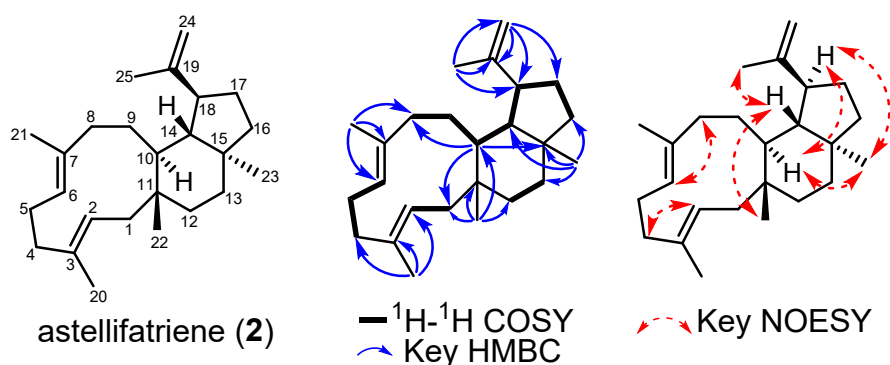

| Pos. | $\delta_{\text{H}}^{\text{a}}$ mult ( $J$ in Hz) | $\delta_{\text{C}}^{\text{b}}$ | COSY ( <sup>1</sup> H- <sup>1</sup> H) | HMBC                   | NOESY  |
|------|--------------------------------------------------|--------------------------------|----------------------------------------|------------------------|--------|
| 1a   | 1.74, m                                          | 39.1                           | 2                                      | 12, 10, 2, 3           |        |
| 1b   | 2.15, m                                          | 39.1                           | 2                                      | 22, 12, 2, 3           |        |
| 2    | 5.04, d (8.2)                                    | 125.0                          | 1                                      | 3, 1, 4, 20            | 4a, 4b |
| 3    | -                                                | 132.5                          | -                                      | -                      |        |
| 4a   | 1.94, m                                          | 39.7                           | 5a, 5b                                 | 20, 5, 2, 3            | 2      |
| 4b   | 2.15, m                                          | 39.7                           | 5a, 5b                                 | 20, 5, 2, 3            | 2      |
| 5a   | 2.00, m                                          | 26.3                           | 6, 4a, 4b                              | 6, 3, 7                |        |
| 5b   | 2.26, qd (4.4, 12.8)                             | 26.3                           | 6, 4a, 4b                              | 4, 6, 3, 7             |        |
| 6    | 4.93, dd (3.7, 11.4)                             | 124.5                          | 5a, 5b                                 | 21, 5, 4, 8            | 8a, 8b |
| 7    | -                                                | 137.7                          | -                                      | -                      |        |
| 8a   | 1.87, m                                          | 42.0                           | 9b                                     | 21, 9, 10, 7, 6        | 6      |
| 8b   | 2.00, m                                          | 42.0                           | 9a, 9b                                 | 6, 7                   | 6      |
| 9a   | 1.21, m                                          | 24.3                           | 8b, 10                                 | 10, 8, 14, 7           |        |
| 9b   | 1.01, m                                          | 24.3                           | 8a, 8b                                 | 10, 8, 14, 7           |        |
| 10   | 1.64, m                                          | 39.8                           | 9a, 14                                 | 22, 9, 1, 8, 15, 14    | 18, 23 |
| 11   | -                                                | 39.1                           | -                                      | -                      |        |
| 12a  | 2.00, m                                          | 34.7                           | 13a, 13b                               | -                      |        |
| 12b  | 1.01, m                                          | 34.7                           | 13a, 13b                               | 22, 13, 15             |        |
| 13a  | 1.51, m                                          | 36.3                           | 12a, 12b                               | 23, 12, 15, 14         |        |
| 13b  | 1.43, m                                          | 36.3                           | 12a, 12b                               | 23, 12, 16, 15, 14     |        |
| 14   | 1.58, t (11.3)                                   | 49.8                           | 18, 10                                 | 23, 13, 10, 15, 18, 19 | 22, 25 |
| 15   | -                                                | 43.9                           | -                                      | -                      |        |
| 16a  | 1.42, m                                          | 40.4                           | 17a                                    | 23, 15, 18, 14         |        |
| 16b  | 1.21, m                                          | 40.4                           | 17b                                    | 23, 17, 13, 15         |        |
| 17a  | 2.00, m                                          | 30.7                           | 16a                                    | 15, 18, 14, 19         |        |
| 17b  | 1.46, m                                          | 30.7                           | 16b                                    | 19                     |        |
| 18   | 2.69, td (5.2, 10.9)                             | 47.5                           | 17a, 17b, 14                           | 25, 17, 10, 14, 24, 19 | 10, 23 |
| 19   | -                                                | 148.6                          | -                                      | -                      |        |
| 20   | 1.47, s                                          | 16.7                           | -                                      | 4, 3, 2                |        |
| 21   | 1.45, s                                          | 16.9                           | -                                      | 8, 7, 6                |        |
| 22   | 0.85, s                                          | 21.2                           | -                                      | 12, 1, 10, 11          | 14     |
| 23   | 0.87, s                                          | 18.0                           | -                                      | 13, 16, 15, 14         | 10, 18 |
| 24a  | 4.77, d (2.4)                                    | 110.5                          | -                                      | 25, 17, 18, 19         |        |
| 24b  | 4.70, dd (1.3, 2.5)                              | 110.5                          | -                                      | 25, 17, 18, 19         |        |
| 25   | 1.70, s                                          | 19.1                           | -                                      | 18, 24, 19             | 14     |

<sup>a</sup>Recorded at 600 MHz in C<sub>6</sub>D<sub>6</sub>. <sup>b</sup>Recorded at 150 MHz in C<sub>6</sub>D<sub>6</sub>.



**Table S4.** Comparison of  $^1\text{H}$  (600 MHz) and  $^{13}\text{C}$  (150 MHz) NMR (in  $\text{CDCl}_3$ ) data of astellifatriene (**2**) to those of **C1** (900 MHz, in  $\text{CDCl}_3$ ) in the literature.<sup>15</sup>

| Pos. | $\delta_{\text{H}}$ mult ( $J$ in Hz),<br>astellifatriene ( <b>2</b> ) | $\delta_{\text{C}}$ ,<br>astellifatriene ( <b>2</b> ) | $\delta_{\text{H}}$ mult ( $J$ in Hz), <b>C1</b> | $\delta_{\text{C}}$ , <b>C1</b> |
|------|------------------------------------------------------------------------|-------------------------------------------------------|--------------------------------------------------|---------------------------------|
| 1    | 1.67, m;<br>2.10, dd (8.2, 16.5)                                       | 38.8                                                  | 1.67, dd (16.6, 1.9);<br>2.11, dd (8.2, 16.6)    | 38.7                            |
| 2    | 4.89, d (8.3)                                                          | 124.8                                                 | 4.89, d (8.2)                                    | 124.6                           |
| 3    | -                                                                      | 132.6                                                 | -                                                | 132.5                           |
| 4    | 1.91, m; 2.18, m                                                       | 39.4                                                  | 1.93, o; 2.19, d (11.9)                          | 39.2                            |
| 5    | 2.02, m;<br>2.26, m                                                    | 26.0                                                  | 2.02, o; 2.26, dddd<br>(12.9, 12.9, 12.9, 4.5)   | 25.8                            |
| 6    | 4.79, dd (11.5, 3.9)                                                   | 124.1                                                 | 4.79, dd (12.9, 4.5)                             | 124.0                           |
| 7    | -                                                                      | 138.0                                                 | -                                                | 137.8                           |
| 8    | 1.70, m;<br>1.82, dd (12.9, 7.6)                                       | 41.7                                                  | 1.70, dd (12.9, 12.9);<br>1.83, dd (12.9, 8.3)   | 41.5                            |
| 9    | 0.96, m; 1.10, m                                                       | 24.0                                                  | 0.95, m; 1.10, m                                 | 23.8                            |
| 10   | 1.53                                                                   | 39.5                                                  | 1.53                                             | 39.4                            |
| 11   | -                                                                      | 38.9                                                  | -                                                | 38.8                            |
| 12   | 1.00, m; 1.90, m                                                       | 34.5                                                  | 1.00, ddd (14.1, 4.3,<br>2.5); 1.91, o           | 34.3                            |
| 13   | 1.43, m; 1.52 m                                                        | 36.0                                                  | 1.43, o; 1.51, o                                 | 35.9                            |
| 14   | 1.55, m                                                                | 49.6                                                  | 1.55, o                                          | 49.4                            |
| 15   | -                                                                      | 43.8                                                  | -                                                | 43.6                            |
| 16   | 1.21, m; 1.43, m                                                       | 40.2                                                  | 1.21, ddd (10.9, 10.9,<br>10.9); 1.43, o         | 40.1                            |
| 17   | 1.41, m; 2.00, m                                                       | 30.5                                                  | 1.40, o; 2.00, o                                 | 30.4                            |
| 18   | 2.65, ddd (10.5, 10.5, 5.0)                                            | 47.3                                                  | 2.66, ddd (10.8, 10.8,<br>5.3)                   | 47.2                            |
| 19   | -                                                                      | 148.8                                                 | -                                                | 148.7                           |
| 20   | 1.49, s                                                                | 16.7                                                  | 1.49, s                                          | 16.5                            |
| 21   | 1.44, s                                                                | 16.8                                                  | 1.44, s                                          | 16.7                            |
| 22   | 0.82, s                                                                | 21.2                                                  | 0.82, s                                          | 21.0                            |
| 23   | 0.87, s                                                                | 18.0                                                  | 0.87, s                                          | 17.9                            |
| 24   | 4.59, brs;<br>4.68, brs                                                | 110.1                                                 | 4.60, dd (2.3, 1.3);<br>4.68, d (2.2)            | 109.9                           |
| 25   | 1.72, s                                                                | 19.1                                                  | 1.72, s                                          | 18.9                            |

**Table S5.** Measured specific rotation of compound **2** computed (Boltzmann-averaged and relative free energies computed at b3lyp/6-311g(d,p) level) specific rotation at different wavelengths.

| Conformers                                           | Wavelength |        |        |        |
|------------------------------------------------------|------------|--------|--------|--------|
|                                                      | 589 nm     | 546 nm | 436 nm | 405 nm |
| <b>2-A</b> (0.9%)                                    | 163.2      | 194.6  | 338.7  | 411.8  |
| <b>2-B</b> (5.8%)                                    | 152.4      | 182.4  | 322.4  | 395.1  |
| <b>2-C</b> (0.3%)                                    | 63.8       | 74.0   | 113.4  | 129.2  |
| <b>2-D</b> (93.0%)                                   | 56.2       | 66.0   | 108.3  | 128.5  |
| Boltzmann-averaged specific rotation                 | 62.7       | 73.9   | 122.8  | 146.5  |
| <b>Mirrored</b> Boltzmann-averaged specific rotation | -62.7      | -73.9  | -122.8 | -146.5 |

**Table S6.** Relative production of the products from EvAS, and its variants. The calculation was based on GC-MS analysis. All data represent the mean of n = 3 biologically independent samples and error bars show standard deviation.

| products | Peak area of GC-MS analysis |              | Relative production (%) |        |        |
|----------|-----------------------------|--------------|-------------------------|--------|--------|
|          | 1                           | 2            | 1                       | 2      | total  |
| EvAS-WT  | 101065±5575                 | 56781±4372   | 100%                    | 56.2%  | 156.2% |
| I66A     | 5106±861                    | 14102±2352   | 5.1%                    | 13.9%  | 19%    |
| S85A     | 0                           | 25143±9388   | 0                       | 24.9%  | 24.9%  |
| S85N     | 0                           | 187919±17532 | 0                       | 185.9% | 185.9% |
| S85L     | 0                           | 0            | 0                       | 0      | 0      |
| S85Y     | 0                           | 0            | 0                       | 0      | 0      |
| S85H     | 0                           | 0            | 0                       | 0      | 0      |
| S85D     | 0                           | 0            | 0                       | 0      | 0      |
| F89A     | 0                           | 0            | 0                       | 0      | 0      |
| F187A    | 0                           | 0            | 0                       | 0      | 0      |
| W188A    | 0                           | 0            | 0                       | 0      | 0      |
| W310A    | 0                           | 0            | 0                       | 0      | 0      |
| S303A    | 0                           | 0            | 0                       | 0      | 0      |
| N307A    | 0                           | 0            | 0                       | 0      | 0      |

**Table S7.** Pocket volumes of EvAS and its variants predicted by POVME.<sup>4</sup>

| TC-models  | volume (Å <sup>3</sup> ) |
|------------|--------------------------|
| EvAS-WT    | 302.4 ± 17.0             |
| EvAS-S85A  | 244.2 ± 11.3             |
| EvAS-S85N  | 230.1 ± 19.2             |
| EvAS-S85D  | 88.8 ± 24.9              |
| EvAS-S85Y  | 22.8 ± 8.2               |
| EvAS-S85L  | 80.9 ± 25.1              |
| EvAS-S85H  | 90.9 ± 29.6              |
| EvAS-I66A  | 71.7 ± 21.3              |
| EvAS-F89A  | 138.8 ± 36.1             |
| EvAS-F187A | 70.8 ± 17.3              |
| EvAS-W188A | 143.3 ± 22.2             |
| EvAS-S303A | 77.8 ± 16.2              |
| EvAS-N307A | 98.9 ± 28.8              |
| EvAS-W310A | 83.6 ± 15.0              |

**Table S8.** Primers for mutation in this study.

|         | Variants | Primers                                           |
|---------|----------|---------------------------------------------------|
| Forward | I66A-F   | AAGGTGGTCTGGCAGACCAGTGGAACGGTGCATCTATC            |
|         | S85A-F   | TCTGGGTGTTGTTAGCTACGCTGCAGAATTCGCGTTCG            |
|         | S85N-F   | TCTGGGTGTTGTTAGCTACGCTAACGAATTCGCGTTCG            |
|         | S85L-F   | TCTGGGTGTTGTTAGCTACGCTCTCGAATTCGCGTTCG            |
|         | S85Y-F   | TCTGGGTGTTGTTAGCTACGCTTACGAATTCGCGTTCG            |
|         | S85H-F   | TCTGGGTGTTGTTAGCTACGCTCACGAATTCGCGTTCG            |
|         | S85D-F   | TCTGGGTGTTGTTAGCTACGCTGATGAATTCGCGTTCG            |
|         | F89A-F   | TCTGGGTGTTGTTAGCTACGCTTCCGAATTCGCGGCAGT           |
|         | F187A-F  | ACCGTATCTACGATGTTGGTATGCTGGCATGGTACGG             |
|         | W188A-F  | ACCGTATCTACGATGTTGGTATGCTGTTCCGATACGGTCT          |
|         | W310A-F  | GTACCTGGAAAGCCTGCTGTACTCCATGTCTGGTAAACGTTGTTGCAGG |
|         | S303A-F  | GTACCTGGAAAGCCTGCTGTACGCAATGTCTGGTAAACGTTGTTGGGG  |
|         | N307A-F  | GTACCTGGAAAGCCTGCTGTACTCCATGTCTGGTGCAGTTGTTGGGG   |
|         | Reverse  | I66A-R                                            |
| S85A-R  |          | CGTAGCTAACAACACCCAGACGGTCCGGCAAAGCTTCTG           |
| F187A-R |          | ACCAACATCGTAGATACGGTATTTCAAGAATTCTTTCTCGTTGTT     |
| S303A-R |          | ACAGCAGGCTTTCCAGGTACAGCATAGTGTCGTGAGAC            |

**Table S9.** Energy analysis for the conformers of (2*E*,6*E*,10*S*,11*R*,14*S*,15*S*,18*S*)-2.

| conformers         | Total Energy (Hartree) |
|--------------------|------------------------|
| <b>2-A</b> (0.9%)  | -976.695215            |
| <b>2-B</b> (5.8%)  | -976.695881            |
| <b>2-C</b> (0.3%)  | -976.693488            |
| <b>2-D</b> (93.0%) | -976.700851            |

**Table S10.** Cartesian coordinates for the conformers of (2*E*,6*E*,10*S*,11*R*,14*S*,15*S*,18*S*)-2.

| 2-A |          |          | 2-B      |   |          | 2-C      |          |   | 2-D      |          |          |   |          |          |          |
|-----|----------|----------|----------|---|----------|----------|----------|---|----------|----------|----------|---|----------|----------|----------|
| C   | -1.54406 | 2.202258 | -0.27275 | C | 1.693633 | 2.142574 | 0.35005  | C | 1.955309 | 2.016489 | 0.452277 | C | -2.08382 | 2.078977 | -0.20094 |
| C   | -2.82202 | 2.01088  | 0.083626 | C | 2.944141 | 1.928577 | -0.08252 | C | 3.072418 | 2.048139 | -0.29045 | C | -2.51983 | 1.501926 | -1.33273 |
| C   | -2.59632 | -1.24213 | -0.23541 | C | 2.561663 | -1.29339 | 0.152194 | C | 2.754602 | -1.22588 | -0.74099 | C | -2.38598 | -1.47007 | -0.06748 |
| C   | -0.27407 | -1.8533  | 0.76945  | C | 0.177846 | -1.78026 | -0.78001 | C | 0.14063  | -1.7817  | -0.77503 | C | -0.06806 | -1.57615 | 1.094241 |
| C   | 0.228694 | -0.40088 | 0.371161 | C | -0.26742 | -0.32577 | -0.32454 | C | -0.33727 | -0.36799 | -0.21623 | C | 0.348079 | -0.24487 | 0.341869 |
| C   | -0.2309  | 0.690246 | 1.373764 | C | 0.196632 | 0.793658 | -1.2946  | C | 0.236084 | 0.828332 | -1.03304 | C | -0.10464 | 1.054902 | 1.063481 |
| C   | -0.4511  | 2.113926 | 0.791134 | C | 0.541617 | 2.16662  | -0.65135 | C | 0.605569 | 2.117404 | -0.2475  | C | -0.60173 | 2.181806 | 0.105674 |
| C   | -4.03824 | 1.821763 | -0.7891  | C | 4.191408 | 1.65395  | 0.722093 | C | 4.463461 | 1.630509 | 0.091669 | C | -3.9213  | 1.073226 | -1.67606 |
| C   | -4.21992 | 0.324263 | -1.2321  | C | 4.313694 | 0.14031  | 1.127472 | C | 4.765869 | 0.20354  | -0.47696 | C | -4.08654 | -0.48088 | -1.55447 |
| C   | -3.79184 | -0.638   | -0.14462 | C | 3.792658 | -0.77066 | 0.037541 | C | 3.786751 | -0.83741 | 0.028691 | C | -3.63048 | -0.98651 | -0.20201 |
| C   | 0.252938 | -2.27655 | 2.159649 | C | -0.41275 | -2.15373 | -2.15925 | C | 0.002819 | -1.85233 | -2.31257 | C | 0.477712 | -1.60454 | 2.539961 |
| C   | -1.09566 | 2.468652 | -1.68882 | C | 1.330742 | 2.3443   | 1.801321 | C | 1.922554 | 1.815754 | 1.947343 | C | -2.98264 | 2.619109 | 0.887066 |
| C   | -4.70395 | -0.73135 | 1.054045 | C | 4.657046 | -0.89455 | -1.19315 | C | 4.040475 | -1.31065 | 1.441033 | C | -4.5933  | -0.78667 | 0.942412 |
| C   | -1.83861 | -1.96059 | 0.851902 | C | 1.731499 | -1.936   | -0.9295  | C | 1.615679 | -2.13283 | -0.35594 | C | -1.62236 | -1.73965 | 1.205251 |
| H   | -0.25658 | -0.16511 | -0.58159 | H | 0.244287 | -0.14023 | 0.625241 | H | 0.047895 | -0.29646 | 0.810313 | H | -0.17559 | -0.26    | -0.62054 |
| C   | 0.191661 | -2.8913  | -0.29293 | C | -0.28042 | -2.82407 | 0.279784 | C | -0.68386 | -2.96379 | -0.16243 | C | 0.463451 | -2.82387 | 0.327465 |
| C   | 2.126823 | -1.43287 | -1.0508  | C | -2.16909 | -1.33517 | 1.110264 | C | -2.53515 | -1.46605 | 0.654757 | C | 2.293108 | -1.49602 | -0.82809 |
| C   | 1.759615 | -0.45391 | 0.107239 | C | -1.79405 | -0.34621 | -0.03556 | C | -1.89072 | -0.30635 | -0.15643 | C | 1.871334 | -0.27988 | 0.048598 |
| H   | 2.227646 | -0.88846 | 1.000581 | H | -2.28014 | -0.75689 | -0.93059 | H | -2.24455 | -0.45528 | -1.18702 | H | 2.376693 | -0.43692 | 1.012237 |
| C   | 3.651449 | -1.22982 | -1.13039 | C | -3.69018 | -1.10922 | 1.209691 | C | -4.02073 | -1.06534 | 0.617705 | C | 3.801707 | -1.22856 | -0.99579 |
| C   | 3.842343 | 0.29783  | -0.9986  | C | -3.86445 | 0.419047 | 1.065676 | C | -4.009   | 0.453505 | 0.891195 | C | 3.899909 | 0.296767 | -1.22825 |
| C   | 2.577832 | 0.830683 | -0.21431 | C | -2.59193 | 0.953156 | 0.301485 | C | -2.61018 | 0.974908 | 0.371692 | C | 2.597561 | 0.935335 | -0.61052 |
| C   | 3.02584  | 1.720935 | 0.937617 | C | -3.0115  | 1.839712 | -0.8617  | C | -2.83457 | 2.144356 | -0.58069 | C | 2.945257 | 2.113951 | 0.285122 |
| C   | 3.428159 | 3.118522 | 0.522281 | C | -3.6187  | 1.182083 | -2.08076 | C | -3.02412 | 3.477753 | 0.106092 | C | 3.647946 | 1.834549 | 1.59544  |
| C   | 3.158416 | 1.324408 | 2.208364 | C | -2.93502 | 3.173423 | -0.77533 | C | -2.9731  | 2.036144 | -1.90689 | C | 2.70996  | 3.371964 | -0.10732 |
| C   | 1.507971 | -1.04542 | -2.41396 | C | -1.52745 | -0.97884 | 2.470569 | C | -2.07539 | -1.52047 | 2.130216 | C | 1.636233 | -1.50786 | -2.22734 |
| C   | 1.685854 | -2.84766 | -0.65171 | C | -1.7625  | -2.75296 | 0.68245  | C | -2.20254 | -2.77541 | -0.06747 | C | 1.94984  | -2.78216 | -0.06344 |
| H   | -3.00616 | 1.841295 | 1.146065 | H | 3.070664 | 1.811399 | -1.16045 | H | 2.944656 | 2.225656 | -1.36182 | H | -1.76138 | 1.178441 | -2.04911 |
| H   | -2.06843 | -1.12837 | -1.18182 | H | 2.067981 | -1.16388 | 1.114681 | H | 2.742637 | -0.85453 | -1.76557 | H | -1.82485 | -1.61424 | -0.99029 |
| H   | 0.483066 | 0.769584 | 2.200442 | H | -0.56465 | 0.96491  | -2.0663  | H | -0.48563 | 1.096534 | -1.81021 | H | 0.718701 | 1.445456 | 1.670921 |
| H   | -1.18321 | 0.382941 | 1.818898 | H | 1.092849 | 0.45806  | -1.82757 | H | 1.14375  | 0.524759 | -1.55421 | H | -0.90992 | 0.829904 | 1.771468 |
| H   | 0.488758 | 2.506533 | 0.391909 | H | -0.34975 | 2.588675 | -0.18093 | H | -0.1796  | 2.373222 | 0.471925 | H | -0.38626 | 3.15303  | 0.570669 |
| H   | -0.71182 | 2.767945 | 1.634304 | H | 0.792091 | 2.849175 | -1.47491 | H | 0.63512  | 2.941655 | -0.97187 | H | -0.0243  | 2.151844 | -0.82364 |
| H   | -4.92818 | 2.142017 | -0.23321 | H | 5.068162 | 1.938238 | 0.127347 | H | 4.604725 | 1.629512 | 1.177647 | H | -4.65775 | 1.565125 | -1.03258 |
| H   | -4.00151 | 2.444097 | -1.69078 | H | 4.234239 | 2.258153 | 1.635927 | H | 5.20961  | 2.323824 | -0.32019 | H | -4.17264 | 1.357867 | -2.70719 |
| H   | -5.26741 | 0.170753 | -1.52845 | H | 5.362742 | -0.07325 | 1.377081 | H | 5.79766  | -0.06557 | -0.20874 | H | -5.13838 | -0.733   | -1.74972 |
| H   | -3.60384 | 0.152993 | -2.12237 | H | 3.725657 | -0.01944 | 2.038612 | H | 4.724006 | 0.253881 | -1.57227 | H | -3.49172 | -0.95485 | -2.34523 |
| H   | -0.02408 | -1.54983 | 2.931316 | H | -0.15241 | -1.40881 | -2.91978 | H | 0.612149 | -1.10432 | -2.82755 | H | 0.149551 | -0.73001 | 3.112623 |
| H   | -0.18263 | -3.24192 | 2.446514 | H | -0.00567 | -3.11689 | -2.49152 | H | 0.319836 | -2.83823 | -2.67386 | H | 0.108792 | -2.49569 | 3.062884 |
| H   | 1.340509 | -2.39316 | 2.189357 | H | -1.50221 | -2.25233 | -2.15074 | H | -1.03357 | -1.7054  | -2.63688 | H | 1.57084  | -1.63606 | 2.581886 |
| H   | -0.5287  | 3.408899 | -1.74407 | H | 0.811673 | 3.303475 | 1.938995 | H | 1.358059 | 2.627727 | 2.4269   | H | -2.8066  | 2.109647 | 1.844077 |
| H   | -0.42098 | 1.681454 | -2.05252 | H | 0.638422 | 1.56802  | 2.155311 | H | 1.410064 | 0.882542 | 2.217804 | H | -4.04655 | 2.531535 | 0.656508 |
| H   | -1.9306  | 2.54142  | -2.39163 | H | 2.2022   | 2.338888 | 2.462233 | H | 2.917149 | 1.793437 | 2.40002  | H | -2.76596 | 3.682616 | 1.060042 |
| H   | -5.68874 | -1.11502 | 0.752467 | H | 5.632075 | -1.32872 | -0.93132 | H | 4.115793 | -0.46935 | 2.142057 | H | -5.48761 | -1.40959 | 0.797567 |
| H   | -4.31759 | -1.39485 | 1.831961 | H | 4.211193 | -1.52886 | -1.96358 | H | 3.272462 | -1.98942 | 1.818435 | H | -4.16245 | -1.05339 | 1.911124 |
| H   | -4.88315 | 0.253263 | 1.508186 | H | 4.867275 | 0.085996 | -1.64326 | H | 5.001568 | -1.84203 | 1.492396 | H | -4.94644 | 0.250854 | 1.003955 |
| H   | -2.07294 | -3.03718 | 0.851896 | H | 1.926175 | -3.01905 | -0.98577 | H | 1.617513 | -2.26522 | 0.731328 | H | -1.80084 | -2.767   | 1.56157  |
| H   | -2.17187 | -1.59416 | 1.829609 | H | 2.037972 | -1.53907 | -1.90438 | H | 1.806081 | -3.136   | -0.77323 | H | -1.99801 | -1.08849 | 2.003582 |
| H   | -0.0639  | -3.8956  | 0.07218  | H | -0.05907 | -3.82868 | -0.1063  | H | -0.4614  | -3.86862 | -0.7438  | H | 0.275571 | -3.71172 | 0.946896 |
| H   | -0.40009 | -2.75259 | -1.20712 | H | 0.340981 | -2.71121 | 1.177815 | H | -0.30517 | -3.16884 | 0.846283 | H | -0.13601 | -2.96867 | -0.57969 |
| H   | 4.091677 | -1.63225 | -2.05066 | H | -4.12114 | -1.49882 | 2.139824 | H | -4.63467 | -1.62045 | 1.33727  | H | 4.251846 | -1.81043 | -1.80908 |
| H   | 4.13343  | -1.7454  | -0.28933 | H | -4.19117 | -1.62832 | 0.381562 | H | -4.42981 | -1.26699 | -0.3813  | H | 4.326998 | -1.50704 | -0.07232 |
| H   | 4.767217 | 0.540555 | -0.46636 | H | -4.78658 | 0.672206 | 0.532953 | H | -4.83397 | 0.96136  | 0.382825 | H | 4.805556 | 0.715786 | -0.77849 |
| H   | 3.911437 | 0.771312 | -1.98396 | H | -3.93578 | 0.906474 | 2.043757 | H | -4.12296 | 0.658448 | 1.961174 | H | 3.954157 | 0.534881 | -2.29576 |
| H   | 1.997739 | 1.457733 | -0.90343 | H | -2.01027 | 1.570889 | 0.994525 | H | -2.05082 | 1.357705 | 1.235231 | H | 1.982744 | 1.319503 | -1.43206 |
| H   | 2.581081 | 3.659877 | 0.079113 | H | -4.4203  | 0.483243 | -1.80646 | H | -2.12263 | 3.769169 | 0.661677 | H | 4.519187 | 1.180666 | 1.457817 |
| H   | 3.800474 | 3.704178 | 1.368427 | H | -4.04152 | 1.928054 | -2.7605  | H | -3.25734 | 4.274796 | -0.60666 | H | 3.994438 | 2.76183  | 2.061734 |
| H   | 4.214444 | 3.091494 | -0.24456 | H | -2.87778 | 0.600416 | -2.64332 | H | -3.8402  | 3.429181 | 0.840418 | H | 2.989511 | 1.327507 | 2.312094 |
| H   | 3.545083 | 1.999184 | 2.96822  | H | -3.29278 | 3.821369 | -1.57199 | H | -3.20626 | 2.903782 | -2.51918 | H | 3.007629 | 4.225941 | 0.496712 |
| H   | 2.89687  | 0.326982 | 2.54712  | H | -2.51556 | 3.669142 | 0.097035 | H | -2.86729 | 1.094801 | -2.43763 | H | 2.212782 | 3.59592  | -1.04791 |
| H   | 1.788413 | -0.03327 | -2.72421 | H | -1.78131 | 0.036507 | 2.793714 | H | -2.32596 | -0.60286 | 2.672333 | H | 1.864156 | -0.6013  | -2.7978  |
| H   | 1.868036 | -1.73456 | -3.18809 | H | -1.89483 | -1.66776 | 3.241336 | H | -2.57788 | -2.35015 | 2.643349 | H | 2.016668 | -2.36027 | -2.80388 |
| H   | 0.415644 | -1.09507 | -2.41973 | H | -0.43637 | -1.05423 | 2.463123 | H | -0.99856 | -1.67302 | 2.239812 | H | 0.547323 | -1.60102 | -2.19017 |
| H   | 1.889299 | -3.56333 | -1.46076 | H | -1.95782 | -3.47462 | 1.488156 | H | -2.64256 | -3.63838 | 0.452286 | H | 2.195365 | -3.67089 | -0.66176 |
| H   | 2.286104 | -3.17795 | 0.207507 | H | -2.39231 | -3.06173 | -0.16349 | H | -2.65354 | -2.75476 | -1.06973 | H | 2.576205 | -2.83679 | 0.837948 |

**Table S11.** The Gibbs free energy profiles for reprotonation sequences mediated by hydroxyl oxygen and carbonyl oxygen of serine, progressing from state **2** to **IM3**.

|                | Thermal correction to Gibbs<br>Free Energy (B3LYP/6-31G(d)) | Total energy/Hartree<br>(mPW1PW91/6-311+G(d,p)) | Imaginary Freq |
|----------------|-------------------------------------------------------------|-------------------------------------------------|----------------|
| <b>2_S-O_H</b> | 0.654343                                                    | -1300.86511                                     | none           |
| <b>TS1</b>     | 0.649553                                                    | -1300.850884                                    | -785.23        |
| <b>IM3_S-O</b> | 0.657684                                                    | -1300.869387                                    | none           |
| <b>2_S=O_H</b> | 0.655674                                                    | -1300.85144                                     | none           |
| <b>TS2</b>     | 0.650079                                                    | -1300.842604                                    | -983.87        |
| <b>IM3_S=O</b> | 0.655953                                                    | -1300.85996                                     | none           |

**Table S12.** Cartesian coordinates of the intermediates and transition states for reprotonation sequences mediated by hydroxyl oxygen and carbonyl oxygen of serine, progressing from state **2** to **IM3**.

| <b>2_S-O_H</b> |          |          | <b>TS1</b> |   |          | <b>IM3_S-O</b> |          |   |          |          |          |
|----------------|----------|----------|------------|---|----------|----------------|----------|---|----------|----------|----------|
| C              | -5.63892 | -2.10518 | -0.09275   | C | -6.01483 | -1.88204       | -0.62277 | C | -3.46528 | -3.25746 | -1.25337 |
| C              | -4.24144 | -1.50916 | -0.32674   | C | -4.70773 | -1.20056       | -1.03881 | C | -3.40328 | -2.00633 | -2.1452  |
| O              | -4.07073 | -0.48175 | 0.65852    | O | -3.99437 | -0.7798        | 0.154804 | O | -2.45389 | -1.06406 | -1.65473 |
| H              | -4.15821 | -1.0987  | -1.34142   | H | -4.90665 | -0.32966       | -1.67386 | H | -4.40383 | -1.55176 | -2.21194 |
| H              | -3.48661 | -2.29151 | -0.20409   | H | -4.05783 | -1.89317       | -1.57632 | H | -3.0987  | -2.28757 | -3.15731 |
| C              | 1.308043 | 3.124288 | -0.55073   | C | 0.902534 | 3.023442       | -0.55865 | C | -0.25216 | 2.612609 | -1.43872 |
| C              | 0.448726 | 2.719949 | -1.50272   | C | 0.094036 | 2.51554        | -1.51312 | C | -1.40315 | 1.842245 | -1.00186 |
| C              | -1.25271 | 0.552698 | 0.324002   | C | -1.12145 | 0.33024        | 0.218564 | C | -1.41413 | 1.588493 | 0.648069 |
| C              | 0.711555 | -0.64522 | 1.551508   | C | 0.909353 | -0.61267       | 1.538519 | C | 1.060614 | 1.102686 | 1.530099 |
| C              | 1.681602 | 0.006417 | 0.480957   | C | 1.846339 | 0.070957       | 0.46299  | C | 1.449468 | 0.527005 | 0.11476  |
| C              | 2.355593 | 1.326611 | 0.92647    | C | 2.372195 | 1.476669       | 0.844601 | C | 1.965228 | 1.574845 | -0.89553 |
| C              | 2.566691 | 2.330026 | -0.24701   | C | 2.303505 | 2.4803         | -0.34268 | C | 0.912626 | 1.945031 | -2.03192 |
| C              | -0.94113 | 3.224995 | -1.78739   | C | -1.34284 | 2.854316       | -1.79693 | C | -2.80397 | 2.467511 | -1.29285 |
| C              | -2.03239 | 2.169322 | -1.3959    | C | -2.30863 | 1.658434       | -1.50987 | C | -3.68328 | 1.994096 | -0.12607 |
| C              | -1.86827 | 1.725796 | 0.043245   | C | -2.17465 | 1.183493       | -0.06291 | C | -2.78755 | 2.162285 | 1.108564 |
| C              | 1.321844 | -0.61554 | 2.971133   | C | 1.466338 | -0.47132       | 2.972816 | C | 2.185575 | 1.975158 | 2.138601 |
| C              | 1.113331 | 4.33876  | 0.326895   | C | 0.525432 | 4.152902       | 0.370709 | C | -0.18182 | 4.08448  | -1.29404 |
| C              | -2.25016 | 2.738787 | 1.097545   | C | -2.75206 | 2.097885       | 1.009497 | C | -2.78702 | 3.604249 | 1.638812 |
| C              | -0.64828 | 0.132967 | 1.647324   | C | -0.49302 | 0.077489       | 1.550484 | C | -0.19815 | 2.025181 | 1.478653 |
| C              | 0.465255 | -2.16326 | 1.217514   | C | 0.787569 | -2.15647       | 1.263799 | C | 0.855876 | -0.09937 | 2.535349 |
| C              | 0.558219 | -2.57827 | -0.2607    | C | 0.967512 | -2.62596       | -0.19087 | C | 0.518907 | -1.47824 | 1.937409 |
| C              | 1.87297  | -2.10523 | -0.94492   | C | 2.253539 | -2.06598       | -0.86572 | C | 1.482281 | -1.91598 | 0.796237 |
| C              | 2.629365 | -1.11463 | -0.00988   | C | 2.90065  | -0.97824       | 0.043515 | C | 2.355847 | -0.70372 | 0.356052 |
| C              | 2.972815 | -3.1687  | -1.15032   | C | 3.450372 | -3.03018       | -1.01199 | C | 2.606333 | -2.91924 | 1.136213 |
| C              | 4.278159 | -2.33854 | -1.30668   | C | 4.67531  | -2.08669       | -1.18322 | C | 3.65307  | -2.70783 | 0.001023 |
| C              | 3.98315  | -0.89634 | -0.73692   | C | 4.238903 | -0.65847       | -0.67128 | C | 3.330574 | -1.31821 | -0.67627 |
| C              | 1.516114 | -1.51042 | -2.32646   | C | 1.877741 | -1.55804       | -2.2774  | C | 0.6313   | -2.52922 | -0.34061 |
| C              | 5.14091  | -0.35462 | 0.084305   | C | 5.325455 | 0.021004       | 0.145018 | C | 4.580672 | -0.52684 | -1.02236 |
| C              | 5.451667 | -1.00645 | 1.413115   | C | 5.674381 | -0.55004       | 1.501138 | C | 5.423373 | 0.028503 | 0.103047 |
| C              | 5.899673 | 0.644142 | -0.38374   | C | 5.989092 | 1.073627       | -0.34929 | C | 4.946224 | -0.36118 | -2.30164 |
| H              | 1.14268  | 4.074265 | 1.392417   | H | 0.680028 | 3.875811       | 1.421519 | H | 0.847718 | 4.430244 | -1.15563 |
| H              | 1.936813 | 5.047425 | 0.166194   | H | 1.179297 | 5.015178       | 0.184971 | H | -0.51442 | 4.504853 | -2.26002 |
| H              | 0.180852 | 4.87583  | 0.136913   | H | -0.50562 | 4.495213       | 0.258734 | H | -0.83724 | 4.488422 | -0.52221 |
| H              | -2.25735 | 2.32057  | 2.106769   | H | -2.79991 | 1.610999       | 1.98784  | H | -2.10922 | 3.736372 | 2.487259 |
| H              | -1.55689 | 3.588257 | 1.095203   | H | -2.14303 | 3.001789       | 1.119976 | H | -2.51282 | 4.34175  | 0.875373 |
| H              | -3.24626 | 3.151943 | 0.892931   | H | -3.76469 | 2.416033       | 0.740657 | H | -3.79325 | 3.864525 | 1.98373  |
| H              | 2.2956   | -1.11703 | 2.997223   | H | 2.484257 | -0.86924       | 3.039729 | H | 3.13868  | 1.438974 | 2.187819 |
| H              | 1.460752 | 0.403054 | 3.346076   | H | 1.491412 | 0.566895       | 3.31805  | H | 2.352984 | 2.908614 | 1.589839 |
| H              | 0.667856 | -1.14083 | 3.678601   | H | 0.84876  | -1.0388        | 3.679779 | H | 1.921179 | 2.255428 | 3.164912 |
| H              | 0.970196 | -2.26059 | -2.91225   | H | 1.407442 | -2.3738        | -2.83966 | H | 0.039986 | -3.35375 | 0.077278 |
| H              | 0.871788 | -0.62673 | -2.24745   | H | 1.160166 | -0.72809       | -2.2509  | H | -0.08195 | -1.82497 | -0.78403 |
| H              | 2.396015 | -1.2258  | -2.9107    | H | 2.742358 | -1.22454       | -2.8581  | H | 1.235118 | -2.94959 | -1.15041 |
| H              | 3.033483 | -3.81846 | -0.26776   | H | 3.555353 | -3.63707       | -0.10366 | H | 3.04427  | -2.68115 | 2.113686 |
| H              | 2.781812 | -3.81721 | -2.01337   | H | 3.336082 | -3.72583       | -1.85104 | H | 2.250442 | -3.9541  | 1.187096 |
| H              | 5.110275 | -2.8098  | -0.77549   | H | 5.538893 | -2.45807       | -0.62408 | H | 4.672134 | -2.72235 | 0.398243 |
| H              | 4.588274 | -2.26629 | -2.35374   | H | 4.994272 | -2.02378       | -2.22803 | H | 3.606517 | -3.50374 | -0.74807 |
| H              | 3.844327 | -0.21611 | -1.58366   | H | 4.047854 | -0.0222        | -1.54244 | H | 2.799233 | -1.5038  | -1.61684 |
| H              | 2.899157 | -1.70347 | 0.878032   | H | 3.201988 | -1.50452       | 0.960062 | H | 2.986722 | -0.46829 | 1.222575 |
| H              | 1.052411 | 0.282282 | -0.36988   | H | 1.219652 | 0.234437       | -0.41978 | H | 0.530071 | 0.116733 | -0.31693 |
| H              | 1.744651 | 1.823857 | 1.689875   | H | 1.798014 | 1.896265       | 1.678557 | H | 2.299467 | 2.499255 | -0.4177  |
| H              | 3.321133 | 1.124303 | 1.399531   | H | 3.40662  | 1.419412       | 1.192638 | H | 2.820652 | 1.191987 | -1.45966 |
| H              | 2.897651 | 1.786317 | -1.13767   | H | 2.670165 | 1.993012       | -1.25274 | H | 0.62846  | 1.019258 | -2.53881 |
| H              | 3.381634 | 3.014371 | 0.019975   | H | 2.986536 | 3.313695       | -0.13579 | H | 1.427944 | 2.615384 | -2.72886 |
| H              | 0.741938 | 1.857076 | -2.10368   | H | 0.516624 | 1.75192        | -2.16883 | H | -1.36786 | 0.849319 | -1.45135 |
| H              | -1.03332 | -0.09267 | -0.5268    | H | -0.76147 | -0.26501       | -0.61862 | H | -1.4941  | 0.499305 | 0.695715 |
| H              | -3.23687 | 0.042169 | 0.477074   | H | -2.97843 | 0.07422        | 0.00196  | H | -3.13225 | 1.509276 | 1.921915 |
| H              | -1.93425 | 1.305677 | -2.06634   | H | -2.0656  | 0.838072       | -2.19746 | H | -3.93836 | 0.938094 | -0.26486 |
| H              | -3.02116 | 2.614564 | -1.57292   | H | -3.3376  | 1.971141       | -1.7225  | H | -4.61814 | 2.560152 | -0.06019 |
| H              | -1.14512 | 4.162847 | -1.26259   | H | -1.67466 | 3.727982       | -1.22944 | H | -2.76217 | 3.560319 | -1.32198 |
| H              | -1.06582 | 3.436773 | -2.8578    | H | -1.4666  | 3.110218       | -2.85765 | H | -3.15967 | 2.123206 | -2.26804 |
| H              | 1.197388 | -2.7576  | 1.777124   | H | 1.542766 | -2.66328       | 1.875283 | H | 1.77774  | -0.20377 | 3.119479 |
| H              | -0.51018 | -2.46393 | 1.62438    | H | -0.17567 | -2.51654       | 1.649586 | H | 0.085206 | 0.173122 | 3.26692  |
| H              | 0.459388 | -3.66993 | -0.3321    | H | 0.969233 | -3.72343       | -0.20845 | H | 0.523408 | -2.21826 | 2.748078 |
| H              | -0.3011  | -2.17171 | -0.81233   | H | 0.090032 | -2.33319       | -0.78454 | H | -0.51147 | -1.47477 | 1.558551 |
| H              | -0.49131 | 1.030293 | 2.255284   | H | -0.43163 | 1.037811       | 2.078061 | H | 0.10437  | 3.040641 | 1.193484 |
| H              | -1.3438  | -0.49564 | 2.224122   | H | -1.18151 | -0.53449       | 2.156365 | H | -0.54799 | 2.132671 | 2.5127   |

|   |          |          |          |   |          |          |          |   |          |          |          |
|---|----------|----------|----------|---|----------|----------|----------|---|----------|----------|----------|
| H | 6.761134 | 1.015779 | 0.165415 | H | 6.801547 | 1.547101 | 0.195952 | H | 5.859591 | 0.161057 | -2.57473 |
| H | 5.693814 | 1.121726 | -1.3388  | H | 5.753791 | 1.493407 | -1.32469 | H | 4.35707  | -0.76493 | -3.12231 |
| H | 6.394715 | -0.63357 | 1.82294  | H | 6.570157 | -0.07407 | 1.909839 | H | 6.365665 | 0.435981 | -0.27366 |
| H | 4.667512 | -0.81024 | 2.156266 | H | 4.862494 | -0.40271 | 2.226092 | H | 4.905672 | 0.834133 | 0.640264 |
| H | 5.532832 | -2.09754 | 1.325748 | H | 5.860544 | -1.63059 | 1.455997 | H | 5.664774 | -0.73867 | 0.849111 |
| H | -5.43277 | 0.162513 | 0.587195 | H | -4.72488 | -0.35429 | 0.71774  | H | -2.62266 | -1.06044 | -0.68623 |
| C | -6.70656 | -1.04103 | -0.10141 | C | -6.85493 | -0.95592 | 0.253512 | C | -3.81715 | -2.90124 | 0.187486 |
| O | -6.44462 | 0.141068 | 0.333764 | O | -6.30641 | -0.11352 | 0.985668 | O | -3.41226 | -1.85453 | 0.717101 |
| H | -5.86093 | -2.88335 | -0.82878 | H | -6.56206 | -2.19942 | -1.51707 | H | -4.17528 | -3.98215 | -1.66824 |
| N | -7.92819 | -1.28741 | -0.52081 | N | -8.18854 | -1.10229 | 0.216345 | N | -4.57347 | -3.78795 | 0.868214 |
| H | -8.63762 | -0.56123 | -0.47364 | H | -8.7591  | -0.53632 | 0.832596 | H | -4.79198 | -3.60011 | 1.838064 |
| H | -8.19684 | -2.19672 | -0.87543 | H | -8.64664 | -1.7838  | -0.3713  | H | -4.917   | -4.64131 | 0.453268 |
| H | -5.66452 | -2.57089 | 0.902409 | H | -5.78756 | -2.78458 | -0.04114 | H | -2.47742 | -3.73646 | -1.24159 |

| 2_S=O_H |          |          | TS2      |   |          | IM3_S=O  |          |   |          |          |          |
|---------|----------|----------|----------|---|----------|----------|----------|---|----------|----------|----------|
| C       | -5.46693 | -0.82453 | 0.559363 | C | -5.84544 | -0.55635 | 0.051904 | C | -5.55334 | -1.60799 | 0.814209 |
| C       | -4.67255 | -2.05298 | 0.260227 | C | -4.9616  | -1.63887 | 0.611528 | C | -4.28976 | -2.42747 | 0.578434 |
| O       | -3.42758 | -2.00786 | -0.07421 | O | -3.70496 | -1.5254  | 0.676718 | O | -3.26078 | -1.90459 | 0.145941 |
| C       | -5.83399 | -0.03968 | -0.74591 | C | -5.78337 | -0.5071  | -1.50263 | C | -6.0276  | -0.90887 | -0.47503 |
| O       | -6.20053 | 1.2795   | -0.43714 | O | -6.21208 | 0.744135 | -1.98648 | O | -6.80957 | 0.245352 | -0.21116 |
| H       | -6.37013 | -1.08066 | 1.121711 | H | -6.87938 | -0.68104 | 0.390954 | H | -6.35876 | -2.20865 | 1.2542   |
| H       | -6.61442 | -0.57935 | -1.29812 | H | -6.35702 | -1.3411  | -1.92973 | H | -6.56114 | -1.62015 | -1.12261 |
| H       | -4.95167 | 0.024722 | -1.38812 | H | -4.74559 | -0.6199  | -1.82744 | H | -5.15425 | -0.55389 | -1.02585 |
| C       | 0.605737 | 3.096782 | -0.24026 | C | 0.457631 | 2.998543 | -0.18748 | C | 0.427261 | 3.048089 | 0.225445 |
| C       | -0.11586 | 2.644671 | -1.28136 | C | -0.38768 | 2.493415 | -1.11014 | C | -0.37368 | 2.540359 | -0.87132 |
| C       | -1.43171 | -0.00291 | 0.178775 | C | -1.24632 | 0.040461 | 0.492996 | C | -1.12054 | 1.086788 | -0.47204 |
| C       | 0.685771 | -0.92046 | 1.39701  | C | 0.975484 | -0.80744 | 1.539519 | C | 0.560383 | -0.47994 | 0.877448 |
| C       | 1.557447 | 0.020871 | 0.468005 | C | 1.740761 | 0.065046 | 0.464592 | C | 1.777199 | 0.260661 | 0.204301 |
| C       | 1.94384  | 1.382993 | 1.093897 | C | 2.166204 | 1.475329 | 0.942072 | C | 2.274707 | 1.513719 | 0.957412 |
| C       | 1.988483 | 2.539891 | 0.051561 | C | 1.913182 | 2.570177 | -0.13463 | C | 1.886491 | 2.879904 | 0.237632 |
| C       | -1.56359 | 2.905901 | -1.60195 | C | -1.86959 | 2.710707 | -1.23919 | C | -1.55852 | 3.436421 | -1.35249 |
| C       | -2.44856 | 1.623478 | -1.4101  | C | -2.69281 | 1.403586 | -0.9907  | C | -2.6558  | 2.446395 | -1.7756  |
| C       | -2.26694 | 1.049929 | -0.02105 | C | -2.37955 | 0.823499 | 0.386762 | C | -2.63357 | 1.377685 | -0.67592 |
| C       | 1.218808 | -0.94716 | 2.847541 | C | 1.647929 | -0.74263 | 2.929136 | C | 0.811897 | -0.77872 | 2.374782 |
| C       | 0.134972 | 4.138465 | 0.747915 | C | 0.072347 | 4.013514 | 0.863201 | C | -0.1802  | 3.721277 | 1.396119 |
| C       | -2.88803 | 1.838512 | 1.107296 | C | -2.90279 | 1.592062 | 1.592455 | C | -3.43663 | 1.796955 | 0.564912 |
| C       | -0.79719 | -0.41866 | 1.493212 | C | -0.47825 | -0.26844 | 1.738164 | C | -0.74875 | 0.368983 | 0.831659 |
| C       | 0.741957 | -2.40708 | 0.883558 | C | 0.973662 | -2.32368 | 1.121214 | C | 0.361017 | -1.88579 | 0.184313 |
| C       | 0.983848 | -2.62089 | -0.62065 | C | 1.064928 | -2.63709 | -0.38305 | C | 0.902625 | -2.0478  | -1.24839 |
| C       | 2.212775 | -1.83496 | -1.16079 | C | 2.225748 | -1.88832 | -1.1006  | C | 2.3769   | -1.58128 | -1.42421 |
| C       | 2.723414 | -0.83919 | -0.07662 | C | 2.846699 | -0.82744 | -0.14293 | C | 2.835106 | -0.80908 | -0.15113 |
| C       | 3.505138 | -2.64258 | -1.40731 | C | 3.490286 | -2.7071  | -1.43835 | C | 3.48144  | -2.65988 | -1.4737  |
| C       | 4.631172 | -1.57043 | -1.3882  | C | 4.60009  | -1.63127 | -1.61363 | C | 4.780102 | -1.88711 | -1.09319 |
| C       | 4.039454 | -0.28667 | -0.68566 | C | 4.078794 | -0.30815 | -0.92824 | C | 4.333903 | -0.53273 | -0.4156  |
| C       | 1.810051 | -1.15763 | -2.49088 | C | 1.677179 | -1.29564 | -2.41949 | C | 2.467273 | -0.75429 | -2.7285  |
| C       | 5.033642 | 0.361111 | 0.263109 | C | 5.165586 | 0.402026 | -0.13885 | C | 5.197375 | -0.15427 | 0.776074 |
| C       | 5.408944 | -0.37498 | 1.529818 | C | 5.690245 | -0.25276 | 1.119358 | C | 5.116964 | -0.99893 | 2.027133 |
| C       | 5.602244 | 1.533966 | -0.04274 | C | 5.677608 | 1.559258 | -0.57632 | C | 6.040093 | 0.88583  | 0.701096 |
| H       | 0.189011 | 3.767098 | 1.780064 | H | 0.35799  | 3.678036 | 1.868651 | H | 0.399571 | 3.545337 | 2.308106 |
| H       | 0.796222 | 5.014166 | 0.705112 | H | 0.620596 | 4.9488   | 0.688742 | H | -0.11128 | 4.806102 | 1.19925  |
| H       | -0.88305 | 4.492254 | 0.566899 | H | -0.99226 | 4.257539 | 0.875999 | H | -1.23223 | 3.483059 | 1.551372 |
| H       | -2.87516 | 1.30264  | 2.060502 | H | -2.9345  | 0.974071 | 2.49482  | H | -3.30547 | 1.092553 | 1.390907 |
| H       | -2.34448 | 2.779046 | 1.258493 | H | -2.26427 | 2.456291 | 1.807727 | H | -3.1771  | 2.798191 | 0.929655 |
| H       | -3.92268 | 2.111917 | 0.867227 | H | -3.91087 | 1.975978 | 1.40489  | H | -4.50387 | 1.811787 | 0.318796 |
| H       | 2.269299 | -1.25576 | 2.878886 | H | 2.69959  | -1.04208 | 2.871333 | H | 1.739805 | -1.33917 | 2.529742 |
| H       | 1.142543 | 0.026566 | 3.341156 | H | 1.61039  | 0.257448 | 3.371959 | H | 0.856533 | 0.123778 | 2.994861 |
| H       | 0.651926 | -1.66829 | 3.449934 | H | 1.152466 | -1.43046 | 3.625455 | H | -0.00587 | -1.39285 | 2.769189 |
| H       | 1.442391 | -1.92108 | -3.18751 | H | 1.237728 | -2.1011  | -3.02017 | H | 2.082312 | -1.35687 | -3.55928 |
| H       | 1.006114 | -0.42321 | -2.36054 | H | 0.888934 | -0.55074 | -2.25256 | H | 1.860938 | 0.160774 | -2.69489 |
| H       | 2.644227 | -0.6492  | -2.98295 | H | 2.450076 | -0.8231  | -3.03213 | H | 3.489584 | -0.46471 | -2.98829 |
| H       | 3.651804 | -3.36925 | -0.59783 | H | 3.733815 | -3.37989 | -0.60615 | H | 3.271798 | -3.447   | -0.7387  |
| H       | 3.480439 | -3.20857 | -2.3457  | H | 3.366935 | -3.33179 | -2.33029 | H | 3.557156 | -3.14599 | -2.45246 |
| H       | 5.515322 | -1.93737 | -0.85882 | H | 5.542029 | -1.96129 | -1.16625 | H | 5.40365  | -2.47695 | -0.41514 |
| H       | 4.965672 | -1.3176  | -2.39902 | H | 4.815496 | -1.44097 | -2.66942 | H | 5.399059 | -1.67578 | -1.97011 |
| H       | 3.807703 | 0.451379 | -1.46064 | H | 3.750651 | 0.381725 | -1.7134  | H | 4.434018 | 0.273769 | -1.15155 |
| H       | 3.061861 | -1.46836 | 0.75861  | H | 3.278624 | -1.40147 | 0.688895 | H | 2.82713  | -1.54874 | 0.659441 |
| H       | 0.926007 | 0.270788 | -0.38925 | H | 1.022511 | 0.244899 | -0.34197 | H | 1.415277 | 0.619296 | -0.76458 |
| H       | 1.225252 | 1.660172 | 1.875229 | H | 1.623014 | 1.760452 | 1.850584 | H | 1.924029 | 1.556195 | 1.991616 |
| H       | 2.915992 | 1.315358 | 1.590814 | H | 3.225585 | 1.487199 | 1.210705 | H | 3.367464 | 1.548182 | 0.997424 |
| H       | 2.457938 | 2.182715 | -0.87064 | H | 2.239965 | 2.201199 | -1.11292 | H | 2.296519 | 2.851109 | -0.77549 |
| H       | 2.634007 | 3.337087 | 0.440551 | H | 2.539489 | 3.440646 | 0.09748  | H | 2.360155 | 3.684841 | 0.810457 |
| H       | 0.369567 | 1.934962 | -1.95355 | H | 0.03759  | 1.826046 | -1.86212 | H | 0.280341 | 2.312162 | -1.71486 |
| H       | -1.02434 | -0.47004 | -0.71803 | H | -0.92247 | -0.4491  | -0.42335 | H | -0.79864 | 0.464784 | -1.31221 |
| H       | -2.97083 | -1.08412 | -0.00882 | H | -3.03666 | -0.42154 | 0.455842 | H | -3.05651 | 0.428041 | -1.02508 |
| H       | -2.15377 | 0.882212 | -2.16342 | H | -2.43352 | 0.674126 | -1.76877 | H | -2.40426 | 2.00476  | -2.7478  |
| H       | -3.49384 | 1.901213 | -1.59889 | H | -3.75868 | 1.632104 | -1.10011 | H | -3.62827 | 2.937823 | -1.88003 |
| H       | -1.97363 | 3.717335 | -0.99395 | H | -2.22608 | 3.493757 | -0.56401 | H | -1.92028 | 4.078855 | -0.54477 |
| H       | -1.67934 | 3.216126 | -2.64876 | H | -2.11527 | 3.045206 | -2.25577 | H | -1.22316 | 4.091933 | -2.16192 |
| H       | 1.542245 | -2.92226 | 1.427847 | H | 1.824205 | -2.80599 | 1.616409 | H | 0.852806 | -2.6371  | 0.81409  |
| H       | -0.18038 | -2.92391 | 1.182945 | H | 0.085825 | -2.81279 | 1.544266 | H | -0.7042  | -2.14226 | 0.196333 |
| H       | 1.100874 | -3.69593 | -0.81182 | H | 1.169643 | -3.72234 | -0.51014 | H | 0.793554 | -3.09808 | -1.54765 |
| H       | 0.088475 | -2.32409 | -1.18353 | H | 0.113552 | -2.38378 | -0.87109 | H | 0.263877 | -1.48644 | -1.94343 |
| H       | -0.83002 | 0.437516 | 2.175685 | H | -0.45617 | 0.640616 | 2.352551 | H | -0.75639 | 1.079182 | 1.668625 |
| H       | -1.37349 | -1.21428 | 1.990189 | H | -1.04767 | -1.00126 | 2.33289  | H | -1.57886 | -0.31669 | 1.035414 |
| H       | 6.351045 | 1.992738 | 0.598033 | H | 6.487323 | 2.062289 | -0.05391 | H | 6.700469 | 1.150098 | 1.523027 |

|   |          |          |          |   |          |          |          |   |          |          |          |
|---|----------|----------|----------|---|----------|----------|----------|---|----------|----------|----------|
| H | 5.348773 | 2.074549 | -0.95168 | H | 5.314998 | 2.040771 | -1.48162 | H | 6.119113 | 1.495276 | -0.19668 |
| H | 6.243326 | 0.116876 | 2.037911 | H | 6.568577 | 0.275477 | 1.500848 | H | 5.889613 | -0.71325 | 2.746321 |
| H | 4.571114 | -0.4205  | 2.238244 | H | 4.936984 | -0.26095 | 1.918696 | H | 4.144589 | -0.89547 | 2.526617 |
| H | 5.704359 | -1.41272 | 1.328812 | H | 5.976369 | -1.29849 | 0.94926  | H | 5.24243  | -2.06637 | 1.807277 |
| H | -7.14003 | 1.316051 | -0.19866 | H | -7.18144 | 0.777323 | -1.9852  | H | -7.66779 | -0.03517 | 0.142867 |
| N | -5.23027 | -3.24607 | 0.260662 | N | -5.51954 | -2.78459 | 1.001099 | N | -4.36173 | -3.75066 | 0.866784 |
| H | -6.20144 | -3.37756 | 0.51344  | H | -6.51934 | -2.93072 | 0.976109 | H | -5.20299 | -4.18836 | 1.210613 |
| H | -4.68056 | -4.06679 | 0.02262  | H | -4.93279 | -3.53542 | 1.346694 | H | -3.5463  | -4.32875 | 0.713829 |
| H | -4.85758 | -0.16005 | 1.178672 | H | -5.4858  | 0.405487 | 0.427053 | H | -5.29343 | -0.82432 | 1.534515 |



## References

1. Y. Matsuda, T. Mitsuhashi, S. Lee, M. Hoshino, T. Mori, M. Okada, H. Zhang, F. Hayashi, M. Fujita and I. Abe, *Angew. Chem. Int. Ed.*, 2016, **55**, 5785-5788.
2. P. Cramer, *Nat Struct Mol Biol*, 2021, **28**, 704-705.
3. M. Ma, M. Xu, H. Xu, Z. Lei, B. Xing, J. S. Dickschat and D. Yang, *Angew. Chem. Int. Ed.*, 2024, **63**, e202405140.
4. J. R. Wagner, J. Sorensen, N. Hensley, C. Wong, C. Zhu, T. Perison and R. E. Amaro, *J Chem Theory Comput*, 2017, **13**, 4584-4592.
5. P. Wang, X. Gao and Y. Tang, *Curr Opin Chem Biol*, 2012, **16**, 362-369.
6. G. W. T. M. J. Frisch, H. B. Schlegel, G. E. Scuseria, M. A. Robb, J. R. Cheeseman, G. Scalmani, V. Barone, G. A. Petersson, H. Nakatsuji, X. Li, M. Caricato, A. V. Marenich, J. Bloino, B. G. Janesko, R. Gomperts, B. Mennucci, H. P. Hratchian, J. V. Ortiz, A. F. Izmaylov, J. L. Sonnenberg, D. Williams-Young, F. Ding, F. Lipparini, F. Egidi, J. Goings, B. Peng, A. Petrone, T. Henderson, D. Ranasinghe, V. G. Zakrzewski, J. Gao, N. Rega, G. Zheng, W. Liang, M. Hada, M. Ehara, K. Toyota, R. Fukuda, J. Hasegawa, M. Ishida, T. Nakajima, Y. Honda, O. Kitao, H. Nakai, T. Vreven, K. Throssell, J. A. Montgomery, Jr., J. E. Peralta, F. Ogliaro, M. J. Bearpark, J. J. Heyd, E. N. Brothers, K. N. Kudin, V. N. Staroverov, T. A. Keith, R. Kobayashi, J. Normand, K. Raghavachari, A. P. Rendell, J. C. Burant, S. S. Iyengar, J. Tomasi, M. Cossi, J. M. Millam, M. Klene, C. Adamo, R. Cammi, J. W. Ochterski, R. L. Martin, K. Morokuma, O. Farkas, J. B. Foresman, D. J. Fox, Gaussian 09, Revision A.02, Gaussian, Inc., Wallingford CT., 2016.
7. L.-L. Sun, W.-S. Li, J. Li, H.-Y. Zhang, L.-G. Yao, H. Luo, Y.-W. Guo and X.-W. Li, *J. Org. Chem.*, 2021, **86**, 3367-3376.
8. Y. Zhang and J. Skolnick, *Proteins*, 2004, **57**, 702-710.
9. G. M. Morris, R. Huey, W. Lindstrom, M. F. Sanner, R. K. Belew, D. S. Goodsell and A. J. Olson, *J. Comput. Chem.*, 2009, **30**, 2785-2791.
10. Y. Duan, C. Wu, S. Chowdhury, M.C. Lee, G. Xiong, W. Zhang, R. Yang, P. Cieplak, R. Luo, T. Lee, J. Caldwell, J. Wang, P. A. Kollman, *J. Comput. Chem.*, 2003, **24**, 1999-2012.
11. W. L. Jorgensen, J. Chandrasekhar, J. D. Madura, R. W. Impey and M. L. Klein, *J. Chem. Phys.*, 1983, **79**, 926-935.
12. J. Wang, R. M. Wolf, J. W. Caldwell, P. A. Kollman and D. A. Case, *J. Comput. Chem.*, 2004, **25**, 1157-1174.
13. C. I. Bayly, P. Cieplak, W. Cornell, and P. A. Kollman, *J. Phys. Chem.*, 1993, **97**, 10269-10280.
14. D. A. Case, K. Belfon, I. Y. Ben-Shalom, S. R. Brozell, D. S. Cerutti, T. E. I. Cheatham, V. W. D. Cruzeiro, T. A. Darden, R. E. Duke, G. Giambasu, M. K. Gilson, H. Gohlke, A. W. Goetz, R. Harris, S. Izadi, S. A. Izmailov, K. Kasavajhala, A. Kovalenko, R. Krasny, T. Kurtzman, T. S. Lee, S. LeGrand, P. Li, C. Lin, J. Liu, T. Luchko, R. Luo, V. Man, K. M. Merz, Y. Miao, O. Mikhailovskii, G. Monard, H. Nguyen, A. Onufriev, F. Pan, S. Pantano, R. Qi, D. R. Roe, A. Roitberg, C. Sagui, S. Schott-Verdugo, J. Shen, C. Simmerling, N. R. Skrynnikov, J. Smith, J. Swails, R. C. Walker, J. Wang, L. Wilson, R. M. Wolf, X. Wu, Y. Xiong, Y. Xue, D. M. York, P. A. Kollman, AMBER 2020, University of California, San Francisco. 2020.
15. Q. Chen, J. Li, Z. Liu, T. Mitsuhashi, Y. Zhang, H. Liu, Y. Ma, J. He, T. Shinada, T. Sato, Y. Wang, H. Liu, I. Abe, P. Zhang and G. Wang, *Plant Commun.*, 2020, **1**, 100051.
16. A. Minami, T. Ozaki, C. Liu and H. Oikawa, *Nat. Prod. Rep.*, 2018, **35**, 1330-1346.
17. H. Sato, K. Saito and M. Yamazaki, *Front Plant Sci.*, 2019, **10**, 802.
18. K. A. Taizoumbe, B. Goldfuss and J. S. Dickschat, *Angew. Chem. Int. Ed.*, 2024, **63**, e202318375.

19. Y. Luo, X. Ma, Y. Qiu, Y. Lu, S. Shen, Y. Li, H. Gao, K. Chen, J. Zhou, T. Hu, L. Tu, H. Zhao, D. Li, F. Leng, W. Gao, T. Jiang, C. Liu, L. Huang, R. Wu and Y. Tong, *Angew. Chem. Int. Ed.*, 2023, **62**, e202313429.
20. J. Y. Liu, F. L. Lin, K. A. Taizoumbe, J. M. Lv, Y. H. Wang, G. Q. Wang, G. D. Chen, X. S. Yao, D. Hu, H. Gao and J. S. Dickschat, *Angew. Chem. Int. Ed.*, 2024, e202407895.
21. R. Chiba, A. Minami, K. Gomi and H. Oikawa, *Org. Lett.*, 2013, **15**, 594-597.
22. H. Chai, R. Yin, Y. Liu, H. Meng, X. Zhou, G. Zhou, X. Bi, X. Yang, T. Zhu, W. Zhu, Z. Deng and K. Hong, *Sci. Rep.*, 2016, **6**, 27181.
23. R. Chen, Q. Jia, X. Mu, B. Hu, X. Sun, Z. Deng, F. Chen, G. Bian and T. Liu, *Proc. Natl. Acad. Sci. U. S. A.*, 2021, **118**, e2023247118.
24. B. Qin, Y. Matsuda, T. Mori, M. Okada, Z. Quan, T. Mitsuhashi, T. Wakimoto and I. Abe, *Angew. Chem. Int. Ed.*, 2016, **55**, 1658-1661.
25. K. Narita, H. Sato, A. Minami, K. Kudo, L. Gao, C. Liu, T. Ozaki, M. Kodama, X. Lei, T. Taniguchi, K. Monde, M. Yamazaki, M. Uchiyama and H. Oikawa, *Org. Lett.*, 2017, **19**, 6696-6699.
26. L. Gao, K. Narita, T. Ozaki, N. Kumakura, P. Gan, A. Minami, C. Liu, X. Lei, K. Shirasu and H. Oikawa, *Tetrahedron Lett.*, 2018, **59**, 1136-1139.
27. G. Bian, Y. Han, A. Hou, Y. Yuan, X. Liu, Z. Deng and T. Liu, *Metab. Eng.*, 2017, **42**, 1-8.
28. Y. Ye, A. Minami, A. Mandi, C. Liu, T. Taniguchi, T. Kuzuyama, K. Monde, K. Gomi and H. Oikawa, *J. Am. Chem. Soc.*, 2015, **137**, 11846-11853.
29. T. Mitsuhashi, J. Rinkel, M. Okada, I. Abe and J. S. Dickschat, *Chemistry*, 2017, **23**, 10053-10057.
30. J. H. Huang, J. M. Lv, Q. Z. Wang, J. Zhou, Y. J. Lu, Q. L. Wang, D. N. Chen, X. S. Yao, H. Gao, and D. Hu, *Org. Biomol. Chem.*, 2019, **17**, 248-251.
31. L. Jiang, H. Yang, X. Zhang, X. Li, K. Lv, W. Zhang, G. Zhu, C. Liu, Y. Wang, T. Hsiang, L. Zhang and X. Liu, *Appl. Microbiol. Biotechnol.*, 2022, **106**, 6047-6057.
32. Y. Matsuda, T. Mitsuhashi, Z. Quan and I. Abe, *Org. Lett.*, 2015, **17**, 4644-4647.
33. M. Okada, Y. Matsuda, T. Mitsuhashi, S. Hoshino, T. Mori, K. Nakagawa, Z. Quan, B. Qin, H. Zhang, F. Hayashi, H. Kawaide and I. Abe, *J. Am. Chem. Soc.*, 2016, **138**, 10011-10018.
34. Z. Quan and J. S. Dickschat, *Org. Lett.*, 2020, **22**, 7552-7555.
35. J. Guo, Y. S. Cai, F. Cheng, C. Yang, W. Zhang, W. Yu, J. Yan, Z. Deng and K. Hong, *Org. Lett.*, 2021, **23**, 1525-1529.
36. L. Jiang, X. Zhang, Y. Sato, G. Zhu, A. Minami, W. Zhang, T. Ozaki, B. Zhu, Z. Wang, X. Wang, K. Lv, J. Zhang, Y. Wang, S. Gao, C. Liu, T. Hsiang, L. Zhang, H. Oikawa and X. Liu, *Org. Lett.*, 2021, **23**, 4645-4650.
37. K. D. Clevenger, J. W. Bok, R. Ye, G. P. Miley, M. H. Verdant, T. Velk, C. Chen, K. Yang, M. T. Robey, P. Gao, M. Lamprecht, P. MP. Thomas, M. N. Islam, J. M. Palmer, C. C. Wu, N. P. Keller, and N. L. Kelleher, *Nat. Chem. Biol.*, 2017, **13**, 895-901.
38. L. Jiang, G. Zhu, J. Han, C. Hou, X. Zhang, Z. Wang, W. Yuan, K. Lv, Z. Cong, X. Wang, X. Chen, L. Karthik, H. Yang, X. Wang, G. Tan, G. Liu, L. Zhao, X. Xia, X. Liu, S. Gao, L. Ma, M. Liu, B. Ren, H. Dai, R. J. Quinn, T. Hsiang, J. Zhang, L. Zhang and X. Liu, *Appl. Microbiol. Biotechnol.*, 2021, **105**, 5407-5417.
39. Z. Quan, A. Hou, B. Goldfuss and J. S. Dickschat, *Angew. Chem. Int. Ed.*, 2022, **61**, e202117273.
40. D. Li, M. Yang, R. Mu, S. Luo, Y. Chen, W. Li, A. Wang, K. Guo, Y. Liu and S. Li, *Chin. Chem. Lett.*, 2023, **34**, 107469.
41. Y. Qiao, Q. Xu, Z. Huang, X. Chen, X. Ren, W. Yuan, Z. Guan, P. Li, F. Li, C. Xiong, H. Zhu, C. Chen, L. Gu, Y. Zhou, C. Qi, Z. Hu, J. Liu, Y. Ye and Y. Zhang, *Org. Chem. Front.*, 2022, **9**, 5808-5818.

42. D. Yan, J. Arakelyan, T. Wan, R. Raina, T. K. Chan, D. Ahn, V. Kushnarev, T. K. Cheung, H. C. Chan, I. Choi, P. Y. Ho, F. Hu, Y. Kim, H. L. Lau, Y. L. Law, C. S. Leung, C. Y. Tong, K. K. Wong, W. L. Yim, N. S. Karnaukhov, R. Y. C. Kong, M. V. Babak and Y. Matsuda, *Acta Pharm. Sin. B.*, 2024, **14**, 421-432.
43. S. Z. Liu, W. J. Wang, Q. P. Liu, M. Yao, L. X. Liao, S. B. Gao, Y. Yu and X. L. Yang, *Org. Lett.*, 2024, **26**, 4475-4479.
44. T. Toyomasu, M. Tsukahara, A. Kaneko, R. Niida, W. Mitsuhashi, T. Dairi, N. Kato, and T. Sassa, *Proc. Natl. Acad. Sci. U. S. A.*, 2007, **104**, 3084-3088.
45. A. Minami, N. Tajima, Y. Higuchi, T. Toyomasu, T. Sassa, N. Kato and T. Dairi, *Bioorg. Med. Chem. Lett.*, 2009, **19**, 870-874.
46. G. Bian, J. Rinkel, Z. Wang, L. Lauterbach, A. Hou, Y. Yuan, Z. Deng, T. Liu and J. S. Dickschat, *Angew. Chem. Int. Ed.*, 2018, **57**, 15887-15890.
47. M. Xu, M. Jia, Y. J. Hong, X. Yin, D. J. Tantillo, P. J. Proteau and R. J. Peters, *Org. Lett.*, 2018, **20**, 1200-1202.
48. T. Toyomasu, A. Kaneko, T. Tokiwano, Y. Kanno, Y. Kanno, R. Niida, S. Miura, T. Nishioka, C. Ikeda, W. Mitsuhashi, T. Dairi, T. Kawano, H. Oikawa, N. Kato, and T. Sassa, *J. Org. Chem.*, 2009, **74**, 1541-1548.
49. T. Mitsuhashi, T. Kikuchi, S. Hoshino, M. Ozeki, T. Awakawa, S. P. Shi, M. Fujita and I. Abe, *Org. Lett.*, 2018, **20**, 5606-5609.
50. T. Shiina, K. Nakagawa, Y. Fujisaki, T. Ozaki, C. Liu, T. Toyomasu, M. Hashimoto, H. Koshino, A. Minami, H. Kawaide and H. Oikawa, *Biosci. Biotechnol. Biochem.*, 2019, **83**, 192-201.
51. L. Jiang, K. Lv, G. Zhu, Z. Lin, X. Zhang, C. Xing, H. Yang, W. Zhang, Z. Wang, C. Liu, X. Qu, T. Hsiang, L. Zhang and X. Liu, *Synth. Syst. Biotechnol.*, 2022, **7**, 1142-1147.
52. P. Zhang, G. Wu, S. C. Heard, C. Niu, S. A. Bell, F. Li, Y. Ye, Y. Zhang and J. M. Winter, *Org. Lett.*, 2022, **24**, 7037-7041.
53. F. Li, S. Lai, W. Yuan, Z. Chen, Z. Guan, C. Chen, H. Zhu, Y. Zhou, J. M. Winter, Z. Xiang, J. Liu, Y. Ye and Y. Zhang, *Org. Lett.*, 2024, **26**, 1734-1738.
54. J.-Y. Liu, F.-L. Lin, K. A. Taizoumbe, J.-M. Lv, Y.-H. Wang, G.-Q. Wang, G.-D. Chen, X.-S. Yao, D. Hu, H. Gao and J. S. Dickschat, *Angew. Chem. Int. Ed.*, e202407895.
55. H. Tao, L. Lauterbach, G. K. Bian, R. Chen, A. W. Hou, T. Mori, S. Cheng, B. Hu, L. Lu, X. Mu, M. Li, N. Adachi, M. Kawasaki, T. Moriya, T. Senda, X. H. Wang, Z. X. Deng, I. Abe, J. S. Dickschat and T. G. Liu, *Nature*, 2022, **606**, 414-419.
